# metaPR<sup>2</sup>: a database of eukaryotic 18S rRNA metabarcodes with an emphasis on protists.

Daniel Vaultot<sup>1, 2</sup>  , Clarence Wei Hung Sim<sup>2</sup>, Denise Ong<sup>2</sup> , Bryan Teo<sup>2</sup>, Charlie Biber<sup>3</sup>, Mahwash Jamy<sup>3</sup>, Adriana Lopes dos Santos<sup>2</sup> 

<sup>1</sup> UMR 7144, ECOMAP, CNRS, Sorbonne Université, Station Biologique de Roscoff, 29680 Roscoff, France

<sup>2</sup> Asian School of the Environment, Nanyang Technological University, 50 Nanyang Avenue, Singapore 639798

<sup>3</sup> Department of Organismal Biology (Systematic Biology), Uppsala University, Uppsala, Sweden

## ORCID

- Daniel Vaultot: 0000-0002-0717-5685
- Adriana Lopes dos Santos: 0000-0002-0736-4937
- Denise Ong: 0000-0001-6053-6948
- Clarence Wei Hung Sim: 0000-0003-2190-7261
- Mahwash Jamy: 0000-0002-2930-9226

 Corresponding author: [vaultot@gmail.com](mailto:vaultot@gmail.com)

Date: February 7, 2022

**Keywords:** 18S rRNA, metabarcodes, database, R, shiny, PCR, protists

**Short title:** metaPR<sup>2</sup> - a database of eukaryotic metabarcodes

## 1 **Abstract**

2 In recent years, metabarcoding has become the method of choice for investigating the composition and  
3 assembly of microbial eukaryotic communities, and an increasing number of environmental datasets are  
4 being published. Although unprocessed sequence files are often publicly available, processed data, i.e.  
5 sequences clustered as operational taxonomic units (OTUs) or amplicon sequence variants (ASVs) are rarely  
6 at hand in a comparable format. This hampers comparative studies between different environments and  
7 datasets, for example examining the biogeographical patterns of specific groups/species, as well analysing  
8 the micro-genetic diversity within these groups. Here, we present a newly-assembled database of processed  
9 18S rRNA metabarcodes that are annotated with the PR<sup>2</sup> reference sequence database. This database,  
10 called metaPR<sup>2</sup>, contains 41 datasets corresponding to more than 4,000 samples and 73,000 ASVs. The  
11 database is accessible through both a web-based interface (<https://shiny.metapr2.org>) and as an R package,  
12 and should prove very useful to all researchers working on protist diversity in a variety of systems.

## 13 Introduction

14 Protists, i.e. microbial eukaryotes that are not plants, animals or fungi (Archibald et al. 2017), are one  
15 of the most dominant life forms on earth, comprising up to 80% of the total eukaryotic diversity in the  
16 environment (De Vargas et al. 2015; Mahé et al. 2017; Massana et al. 2015). Protists play key ecological  
17 roles and are involved in primary productivity, nutrient cycling and carbon sequestration. It is thus crucial  
18 to assess protist diversity and the factors that determine community composition in order to predict how  
19 protists will respond to environmental change (Cavicchioli et al. 2019). While protists have historically  
20 been more difficult to study due to their small size, the explosion of metabarcoding studies over the past  
21 ten years have greatly expanded our knowledge of these organisms (Burki et al. 2021; Santoferrara et al.  
22 2020).

23 Metabarcoding reveals the taxa present in an environment by amplifying and then massively sequencing a  
24 standardised genetic marker (Santoferrara 2019; Taberlet et al. 2012). In recent years, it has become a  
25 very powerful and widespread approach to investigate protist diversity in a range of environments (marine,  
26 freshwater, soils, microbiomes etc.). By far, the most common marker used for eukaryotic microbes is the  
27 gene coding for small ribosomal subunit RNA (18S rRNA). This gene has the advantage of being universal  
28 and having well annotated reference databases such as Silva or PR<sup>2</sup> (Guillou et al. 2013; Quast et al. 2013)  
29 which allow, for many protist groups, a precise taxonomic assignment. Within the 18S rRNA gene, several  
30 variable regions have been used as barcodes, in particular the V4 region located near the middle of the  
31 gene and the shorter V9 region located at its 3' end (Burki et al. 2021; Pawlowski et al. 2012). The V4  
32 region in particular is currently most often used in recent studies (Lopes dos Santos et al. 2021). Over the  
33 years, metabarcoding has been used to study various aspects of protist diversity. The first studies aimed  
34 to simply establish the real extent of eukaryotic diversity that was underestimated with traditional clone  
35 library approaches (e.g. Stoeck et al. 2009). In marine waters, metabarcoding studies extended quickly and  
36 now tackle more focused questions, for example analysing the distribution of protist groups in the ocean as  
37 a function of their size (De Vargas et al. 2015), the diversity of heterotrophic protists in the deep layers of  
38 the ocean (Giner et al. 2020; Obiol et al. 2021), detailed biogeographic distribution of specific taxa (e.g.  
39 Malviya et al. 2016; Yau et al. 2020), factors structuring marine plankton communities (Logares et al.  
40 2020; Sommeria-Klein et al. 2021), and the seasonal succession of taxa (e.g. Giner et al. 2019; Lambert  
41 et al. 2019). Fewer metabarcoding studies have been carried out in freshwater and soils, but that is rapidly  
42 changing with some large scale studies (e.g. for soils Mahé et al. 2017).

43 Most eukaryotic metabarcoding studies have targeted one specific environment, thereby preventing large  
44 scale comparisons. On the other hand, large metabarcoding projects using the 16S rRNA gene have

45 been undertaken such as the Earth Microbiome Project which encompassed more than 23,000 samples  
46 of both free-living or host-associated microbes, and allowed inferences of global patterns of prokaryotic  
47 diversity (Thompson et al. 2017). For eukaryotic 18S rRNA, large expeditions for sample collections have  
48 been undertaken in particular for marine systems such as *Tara Oceans*, Ocean Sampling Day (OSD) and  
49 Malaspina (De Vargas et al. 2015; Duarte 2015; Kopf et al. 2015). Many studies that performed analyses  
50 on the global ocean microbiota have used one or several of these three datasets, in particular *Tara Oceans*  
51 (e.g. Ibarbalz et al. 2019; Sommeria-Klein et al. 2021). Many more smaller-scale metabarcoding studies  
52 have also been carried out, in particular for environments that have been not sampled by these expeditions,  
53 such as soils or freshwater lakes and rivers (Lopes dos Santos et al. 2021). Unfortunately, it is difficult  
54 to combine the data from these studies with those of the large scale expeditions for a range of reasons.  
55 First, even if the unprocessed data files containing raw reads have been deposited to GenBank SRA (Small  
56 Reads Archive), secondary data, i.e. clustered sequences at a certain similarity level, so-called Operational  
57 Taxonomic Units (OTUs), or Amplified Sequence Variants (ASVs, Callahan et al. 2016) that do not depend  
58 on a specific similarity threshold, are rarely available or, if available, hard to locate since they are stored  
59 in a range of formats (DOCX, XLSX or TXT files) as supplementary files. Second, OTUs clustered with  
60 different levels of similarity (e.g. 97 vs 99%) are not directly comparable: if two studies are to be combined,  
61 it is necessary to perform clustering again, starting from the raw sequences. Third, taxonomic assignment  
62 is often done with different reference databases, such as GenBank, Silva or PR<sup>2</sup> (Guillou et al. 2013; Quast  
63 et al. 2013). Some studies have tried to combine sets of samples from different environments (e.g. marine,  
64 freshwater and soil, Singer et al. 2021), but these efforts remain limited (for example, the Singer et al. 2021  
65 only included 122 sampling sites). Thus, there is clearly a need to provide the protist research community  
66 with a reference database of metabarcodes which would allow the full exploration of the available sequencing  
67 data by combining existing studies across different environments.

68 In this paper, we introduce a database of metabarcodes (metaPR<sup>2</sup>) containing more than 4,150 samples  
69 originating from 41 public studies, most using the V4 region of the 18S rRNA gene. In order for the  
70 different metabarcodes to be directly comparable, we reprocessed all primary files (except those from the  
71 *Tara Oceans* expedition) with the same pipeline based on the dada2 R package (Callahan et al. 2016) and  
72 assigned the taxonomy of the resulting ASVs using PR<sup>2</sup> as a reference database (Guillou et al. 2013). We  
73 have developed a web application available in several forms (website, R package, Docker container) that  
74 allow to analyse, visualize and download the data. This database will be extended in the future and should  
75 prove very useful to the protist research community.

## 76 Material and Methods

### 77 Dataset selection and metabarcoding processing

78 Datasets were selected from published studies (Table 1). Raw sequence files and metadata were downloaded  
79 from NCBI SRA website (<https://www.ncbi.nlm.nih.gov/Traces/study>) when available or obtained directly  
80 from the investigators. Information about the study and the samples (substrate, size fraction etc...) as  
81 well as the available metadata (geographic location, depth, date, temperature etc...) were stored in  
82 three distinct tables in a custom MySQL database. For each study (except for the V9 *Tara Oceans*  
83 dataset, see below), raw sequences files were processed independently *de novo* on the Roscoff ABIMS  
84 (Analysis and Bioinformatics for Marine Science) cluster. Primer sequences were removed with *cutadapt*  
85 (Martin 2011) using the default parameters (maximum error rate = 10%). Amplicon processing was  
86 performed under the R software (R Development Core Team 2013) using the *dada2* package (Callahan  
87 et al. 2016). Read quality was visualized with the function `plotQualityProfile`. Reads were filtered using  
88 the function `filterAndTrim`, adapting parameters (`truncLen`, `minLen`, `truncQ`, `maxEE`) as a function of  
89 the overall sequence quality. Merging of the forward and reverse reads was done with the `mergePairs`  
90 function using the default parameters (`minOverlap` = 12, `maxMismatch` = 0). Chimeras were removed  
91 using `removeBimeraDenovo` with default parameters. For the *Tara Oceans* dataset, because of the very  
92 high read coverage, we did not reprocess the Illumina read files and used the sequences that had been and  
93 clustered with the *Swarm* software (Mahé et al. 2014) as detailed in de Vargas et al. (2015). ASVs with  
94 similar sequences from different studies were merged together and identified with a unique 10 character  
95 code which corresponds to the start of 40-character hash value of the sequence (using the R function  
96 `digest::sha1`). Taxonomic assignment of all ASVs, including those from *Tara Oceans*, was performed using  
97 the `assignTaxonomy` function from *dada2* against the PR<sup>2</sup> database (Guillou et al. 2013) version 4.14 (<https://pr2-database.org/>). ASV sequence and taxonomy, as well as abundance in each sample, were stored in  
98 MySQL tables in the same database as the metadata (see above). In order to limit the size of the database,  
99 we only considered ASVs that corresponded to more than 100 reads in any given studies. The number of  
100 reads in each sample was normalized to 100 such that the read abundances could be expressed as % of total  
101 eukaryotic reads in some visualizations (e.g. in maps, see below). We also did not consider sequences that  
102 had an assignment bootstrap value lower than 75% at the supergroup level. Sequence processing scripts  
103 can be found in [https://github.com/vaulot/Paper-2021-Vaulot-metapr2/tree/main/R\\_processing](https://github.com/vaulot/Paper-2021-Vaulot-metapr2/tree/main/R_processing).

## 105 **Metabarcoding analysis**

106 Since the datasets included into metaPR<sup>2</sup> used different sets of primers (see below Table S3), we clustered  
107 ASVs with 100% similarity using *vsearch* `-cluster_fast` option. ASVs within each cluster were merged  
108 together, using the centroid ASV as the new ASV. In order to evaluate the similarity of ASVs to existing  
109 sequences, we followed the approach of Metz et al. (2021). We compared ASVs to sequences from the PR<sup>2</sup>  
110 database (Guillou et al. 2013) version 4.14 (<https://pr2-database.org/>) using the *vsearch* `-usearch_global`  
111 function with `iddef = 2`. The similarity information was stored in the MySQL database and then retrieved  
112 and merged with the ASV information using an R script. Alpha and beta diversity analyses were performed  
113 using the R *phyloseq* package (McMurdie and Holmes 2013).

## 114 **Ecological function**

115 We used the table provided in Table S2 of Sommeria-Klein et al. (2021) which defines one of 4 ecological  
116 functions (phototroph, phagotroph, parasite, metazoa) to taxonomic groups (mostly at the class or division  
117 level). This table was merged with the PR<sup>2</sup> taxonomy table, propagating the ecological function down to  
118 the species level. For taxonomic groups for which the paper had not defined any function, we complemented  
119 it based on general knowledge for protists (see Table S1)

## 120 **R shiny application**

121 All post-processing was done with the R software. The data were extracted from the MySQL database using  
122 a custom script and stored in files using the R *qs* package that allows extremely fast loading of files (Travers  
123 2021). The data are post-processed using packages *dplyr* and *tidyr*. An R shiny application was developed  
124 to interact with the database using the following R packages: *shiny*, *DT*, *shinyvalidate*, *shinyWidgets*  
125 and *shinycssloaders* (Sali and Attali 2020). Data are plotted using packages *ggplot2*, *treemapify*, *leaflet*,  
126 *leaflet.minipie* and *plotly*. Alpha and beta diversity analyses are performed using the *phyloseq* package  
127 (McMurdie and Holmes 2013). The shiny application is available in 3 forms: a web-based application  
128 (<https://shiny.metapr2.org>), an R package (<https://github.com/pr2database/metapr2-shiny>) or a Docker  
129 container (<https://hub.docker.com/repository/docker/vaulot/metapr2>). The web interface is running on  
130 a Google Cloud Virtual Machine with a 10 Go virtual disk and 4 Go of memory. Both the R package and  
131 the Docker container can be installed on any computer.

## 132 Results and Discussion

### 133 Overview of metaPR<sup>2</sup> datasets

134 Forty-one datasets are included in the first version of the metaPR<sup>2</sup> database (Table 1). We selected global  
135 oceanic datasets (OSD, Malaspina, *Tara* Oceans) that have been used in numerous publications (e.g. Giner  
136 et al. 2020; Ibarbalz et al. 2019; Tragin and Vaultot 2018) as well as smaller data sets in particular from  
137 polar waters which have been little explored. Eleven out of the 41 datasets were sequenced using the 454  
138 technology and the rest with Illumina (mostly 2x250). The vast majority of the 41 datasets used the V4  
139 region of the 18S rRNA gene which is the most used metabarcode to date (Lopes dos Santos et al. 2021),  
140 with only two datasets representing the V9 region (*Tara* Oceans and Argentinian lakes, Table 1). The  
141 most common primer pairs used for V4 (Figure S1, Table S2 and S3) were those designed by Stoeck et al.  
142 (2010) and modified by Piredda et al. (Piredda et al. 2017). The V4 metabarcodes varied from 309 bp to  
143 672 bp and were overlapping (Figure S1).

144 The metaPR<sup>2</sup> database contains more than 4,150 samples (Figure 1). These samples originate from  
145 three major ecosystems: marine, freshwater and terrestrial (mostly soil substrate) (Figure 2). Among  
146 water samples, different size fractions from pico (0.2-3  $\mu\text{m}$ ) to meso (100-1000  $\mu\text{m}$ ) are represented with  
147 the majority corresponding to the pico and total fractions (Figure 2). Most aquatic samples correspond  
148 to surface or euphotic layer. Location data (longitude, latitude) are available for all samples but other  
149 metadata, e.g. temperature or salinity, may be missing for some samples (Figure S2).

150 The number of samples per dataset is quite heterogeneous ranging from less than 10 to almost 900 for  
151 *Tara* Oceans (Table 1). The total number of reads analysed is almost 900 million for V9 and above 220  
152 million for V4. The number of reads per dataset is also highly variable ranging from about 3,000 in the  
153 older studies sequenced by 454 technology to more than 1 million for *Tara* V9 (Table 1), which explains  
154 why overall there are more reads for V9 than V4 despite only 2 datasets using V9. The total number of  
155 ASVs was about 79,000. The number of ASVs in a given study ranges from less than 100 to more than  
156 14,000 depending on both the number of samples and the depth of sequencing (Table 1). Since different  
157 studies have used different primer sets, it is necessary to cluster ASVs with 100% similarity in their shared  
158 region, leading to slight reduction of the total number of ASVs from 79,000 to 70,000 once clustered.  
159 In general, sequences included in a given cluster were widely overlapping, although a few bases could be  
160 different outside the overlap region, pointing to some microdiversity within these clusters (Figure S3). All  
161 results presented below used the clustered ASVs that we call cASVs.

## 162 Protist composition

163 Overall, the database is dominated by Opisthokonta (Metazoa and Fungi) and Alveolata (Dinoflagellata)  
164 (Figure S4). In what follows, we decided to focus on protists and on the V4 region. The focus on protists is  
165 justified because the sampling strategy of most datasets was optimal for microbial eukaryotes. DNA from  
166 those three divisions not included in protists (metazoa, plants and fungi) were probably unevenly sampled,  
167 e.g. plant seeds in soils, multicellular organism, larval stages of metazoa in water environments. The focus  
168 on the V4 datasets that contain almost 3,000 samples and 850 sites is due to that fact that the data for  
169 the V9 region are dominated by the *Tara* Oceans dataset, which has been extensively analysed previously  
170 (e.g., De Vargas et al. 2015).

171 Protist sequences represent more than 40,000 ASVs (33,000 cASVs once clustered). In terms of reads and  
172 cASVs, the database is dominated by Alveolata, followed by Stramenopiles, Hacrobia, Archaeplastida and  
173 Rhizaria (Figure 3). Based on number of cASVs, Rhizaria despite their lower read abundance come just after  
174 the Stramenopiles. Such large number of Rhizaria unique sequences compared to read numbers has been  
175 observed before, possibly linked to higher error rates in regions of the RNA molecule that form secondary  
176 structures (2011). The most abundant cASVs (Figure 4A) belong to dinoflagellates (*Gyrodinium*), diatoms  
177 (*Minidiscus*, *Porosira*, *Fragilariopsis*), cryptophytes (*Geminigera*, *Cryptomonas*), haptophytes (*Phaeocystis*)  
178 and green algae (*Bathycoccus*, *Micromonas*). The most abundant cASVs are often also the most frequently  
179 occurring (Figure 4B and C), although for example the marine picoplanktonic genus *Florenciella* is quite  
180 frequent despite being not one of the most abundant. In contrast, the abundant small diatom *Minidiscus*  
181 cASV is not present among the 30 most frequent cASVs. The difference in reads abundance and cASV  
182 frequency among these two marine phytoplanktonic genera might be a reflection of their coastal-oceanic  
183 distribution, which can be easily observed with the online platform of metaPR<sup>2</sup>. *Florenciella* is truly  
184 a ubiquitous genus, found in both coastal and oceanic samples, although often in low abundance. In  
185 contrast, the nanoplanktonic diatom *Minidiscus* is mostly found in coastal environments or continental  
186 platforms, where it can form sporadic blooms (Leblanc et al. 2018).

187 Comparing the metaPR<sup>2</sup> metabarcodes to reference databases such as PR<sup>2</sup>, reveals that there are very  
188 few novel metabarcodes for supergroups such as Hacrobia and Archaeplastida that contain many photo-  
189 synthetic taxa. In contrast, for supergroups that contain mostly heterotrophic organisms, and in particular  
190 Amoebozoa, the median similarity of metabarcodes to any reference sequence is below 90% (Figure 5A)  
191 suggesting the existence of a lot of unknown taxa. A similar observation was recently done for a restricted  
192 set of samples from a river floodplain in Argentina (Metz et al. 2021).



## 193 **Global trends across environments**

194 The metaPR<sup>2</sup> database corroborates some trends that have been observed in papers with much fewer  
195 samples. Singer et al. (2021) examined patterns of diversity across marine, freshwater and terrestrial (soil)  
196 ecosystems based on 122 samples. Using the metaPR<sup>2</sup> database which contain 23 times more samples  
197 we are able to establish clear differences across 5 types of ecosystems: marine, coastal, freshwater lakes  
198 and rivers and terrestrial (soils). In terrestrial environments, Hacrobia are almost completely absent while  
199 Amoebozoa are present but in contrast absent in all the others environments (Figure 6A). If we use the  
200 ecological function, as defined for each major taxonomic group by Sommeria-Klein et al. (2021), the five  
201 environments clearly differ by the abundance of parasites, small number of phototrophs and absence of  
202 dinoflagellates in soils. While parasites are abundant in soils, they are not as abundant in freshwater and  
203 increase from coastal to oceanic waters (Figure 6B). In terms of diversity, using the Shannon index as  
204 an indicator, terrestrial ecosystems are most diverse, followed by rivers, oceanic, coastal with lakes the  
205 less diverse in agreement with previous analyses (Singer et al. 2021), these differences being all significant  
206 (Figure S6). Most cASVs are restricted to a single type of ecosystem with less than 2% (620 out of  
207 33235) common to two or more if we consider coastal and oceanic ecosystems together (Figure 7). The  
208 highest number of cASVs corresponds to marine ecosystems (coastal and oceanic), followed by terrestrial  
209 and freshwater. Interestingly, both coastal and oceanic have a large number of specific cASVs with roughly  
210 1/3 purely oceanic, 1/3 purely coastal and 1/3 common. It is also striking that there are very few cASVs  
211 common between freshwater rivers and lakes (just above 7%). In terms of novelty, i.e. of cASVs with low  
212 similarity to known sequences, terrestrial ecosystems are the least known with a median similarity below  
213 95% followed by rivers, lakes, coastal and pelagic ecosystems (Figure 5B). In some way, this reflects the  
214 fact that soil protists have only been recently investigated (Geisen et al. 2018). A comparison between the  
215 communities structures from these different ecosystems using NMDS (Figure 8) reveals a clear gradient from  
216 terrestrial ecosystems, through rivers and lakes, towards coastal and then oceanic systems. Interestingly,  
217 river communities are the closest to soil communities, as they are probably enriched in terrestrial protists  
218 through soil drainage.

## 219 **R Shiny application**

220 With a database of such size and complexity, it is necessary to create tools that allow in a first step to  
221 explore the database and then to download the data of interest (e.g. for a specific taxonomic group or  
222 environment). For this purpose, we developed an R Shiny application (Figure 9). R Shiny is an open  
223 source tool that offers numerous advantage to develop web-based applications in comparison to coding

224 directly under languages such as JavaScript or PHP. It offers predefined components allowing the user to  
225 interact with the data (User Interface), while the Server component performs the necessary computations  
226 (e.g. filtering, summarizing the data etc. . . ) in the background. Moreover, a Shiny application can be easily  
227 deployed on a server using open source tools such as Shiny Server, be packaged in a Docker container that  
228 can be downloaded on a personal computer and run locally or delivered as an R package.

229 The metaPR<sup>2</sup> Shiny application is structured in a number of panels, each dedicated to one type of analysis  
230 (e.g. map, diversity). It is possible to select/deselect specific datasets or groups of datasets, such as all  
231 oceanic datasets (Figure S8). Selection can also be done based on sample characteristics such as whether  
232 samples come from DNA or RNA, the ecosystem, the type of substrate (e.g. ice, water, soil), the size  
233 fraction and the depth level (Figure S9). It is possible through reactive menus to navigate the taxonomy tree  
234 down to the cASV level (below the species) that potentially corresponding to cryptic or subspecies. cASVs  
235 can be filtered based on the number of reads found for this cASV in the whole database (between 100 and  
236 10,000). The number of total reads for a given taxonomic level can be visualized in a treemap (Figure S10).  
237 For this representation, number of reads are normalized to 100 for each sample. The distribution of any  
238 taxon can be visualized on a map (Figure S11). Two visualization modes are proposed for maps: either  
239 a pie chart at each station with a fraction of the different taxa immediately below the level selected (for  
240 example species, if genus is the level selected) or, alternatively, a colour circle indicating the dominant  
241 taxon immediately below the level selected (for example the dominant species in the previous example).  
242 The size of the circles is proportional to the percent of reads of the taxon selected relative to the total  
243 number of eukaryotic reads. The size of the circles can be adjusted for taxa in low abundance. Another  
244 representation is in the form of barplot (Figure S12), where the x-axis represents the fraction of reads per  
245 taxon while the y-axis represents one of the variable from the metadata (depth level, temperature). For  
246 continuous variable, bins are created. This panel can also be used for time series with different levels of  
247 aggregation (year, month, day). Alpha and beta diversity (Figure S13) can be computed for a limited  
248 number of samples (1,000 maximum). It is possible to query the whole set of cASV using a BLAST like  
249 query and to map the resulting cASVs (Figure S14). Finally, it is possible to download datasets and  
250 samples metadata as well as the cASV and the read abundance for the datasets, samples and taxa selected  
251 (Figure S15).

252 The metaPR<sup>2</sup> shiny application besides being very useful for research can also be used for pedagogical  
253 purposes. MetaPR<sup>2</sup> can be used as a tool by professors and instructors in the field of microbial ecology. In  
254 the framework of the undergraduate course ES2304 - Microbes in Natural Systems at Nanyang Technological  
255 University (Singapore), the application was used to investigate the biogeography of several groups of  
256 phytoplankton (diatoms, bolidophytes, dinoflagellates, green algae) by groups of 4 students in a flipped-

257 classroom model. Each group had to do some research on the genus it was assigned and then to analyse the  
258 distribution and diversity of key species, answering questions such as whether some species had ubiquitous  
259 distributions or controlled by latitude or temperature and whether some species appeared to contain different  
260 genotypes as reflected by the presence of several cASVs. In order to make their analysis less daunting,  
261 they only analysed the OSD, Malaspina and Tara V4 datasets. Despite the fact that they had only one  
262 week to discover the interface and produce their analyses, this hands-on experience resulted in very positive  
263 feedbacks by the students, especially regarding using the platform to look at "real-world research data".

## 264 **Perspectives**

265 As its sister database PR<sup>2</sup> which is revised every 6-12 months with the addition of novel sequences as well  
266 update in taxonomy, the metaPR<sup>2</sup> will evolve with time to include more datasets and more samples, in  
267 particular from ecosystems (e.g. extreme environments), regions (e.g. tropical and southern latitudes) and  
268 substrate (microbiomes) that are still little represented. We have tabulated more than 280 metabarcoding  
269 studies of protist diversity, for most of which data are available from GenBank SRA. These data will be  
270 processed and incorporated into the database with probably yearly releases. The taxonomy of metaPR<sup>2</sup>  
271 will evolve in parallel to that of PR<sup>2</sup> and we will add other functional and phenotypic traits (e.g. size,  
272 mixotrophy type) as there is clear tendency to use this approach more widely for protists (Schneider et al.  
273 [2020](#)). We will also develop novel functionalities for the R shiny application and package, for example  
274 heatmaps and phylogenetic analyses. This will constitute a very rich resource that will help to compare  
275 eukaryotic communities across habitats.

## 276 **Data availability**

277 Source code for the Shiny server is available as an R package from GitHub  
278 (<https://github.com/pr2database/metapr2-shiny>, DOI: 10.5281/zenodo.5992354). Source code for this  
279 paper is available from GitHub  
280 (<https://github.com/vaulot/Paper-2021-Vaulot-metapr2>). Source code for sequence processing is avail-  
281 able from GitHub [https://github.com/vaulot/Paper-2021-Vaulot-metapr2/tree/main/R\\_processing](https://github.com/vaulot/Paper-2021-Vaulot-metapr2/tree/main/R_processing).

## 282 **Acknowledgements**

283 We thank Javier de Campo, Catherine Ribeiro, Ana Maria Cabello for their shiok suggestions on the shiny  
284 application. We thank the ABIMS platform of the FR2424 (CNRS, Sorbonne Université) for bioinformatics  
285 resources. The work of MJ and CB in the Burki lab was supported by a grant from Science for Life  
286 Laboratory available to F. Burki.

## 287 **Author contributions statement**

288 DV conceived the study. DV, AL, DO, BT, CB scanned the literature and metadata. DV, DO, BT, MJ,  
289 CB collected and compiled metadata from the different datasets. DV developed the database structure,  
290 the analysis scripts and the R shiny application. DV performed the metabarcoding analyses. CS compiled  
291 the functional trait information. DV and AL wrote the first draft of the paper, and all co-authors edited  
292 and approved the final version.

## 293 **Additional information**

294 **Competing interests.** The authors declare no competing financial interests.

## 295 References cited

- 296 Archibald, J., Simpson, A., & Slamovits, C. (2017). *Handbook of the protists*. Springer International  
297 Publishing.
- 298 Behnke, A., Engel, M., Christen, R., Nebel, M., Klein, R. R., & Stoeck, T. (2011). Depicting more accurate  
299 pictures of protistan community complexity using pyrosequencing of hypervariable SSU rRNA gene  
300 regions. *Environmental Microbiology*, *13*, 340–349.
- 301 Burki, F., Sandin, M. M., & Jamy, M. (2021). Diversity and ecology of protists revealed by metabarcoding.  
302 *Current Biology*, *31*, R1267–R1280.
- 303 Callahan, B. J., McMurdie, P. J., Rosen, M. J., Han, A. W., Johnson, A. J. A., & Holmes, S. P. (2016).  
304 DADA2: High-resolution sample inference from Illumina amplicon data. *Nature Methods*, *13*, 581–  
305 583.
- 306 Cavicchioli, R., Ripple, W. J., Timmis, K. N., Azam, F., Bakken, L. R., Baylis, M., Behrenfeld, M. J.,  
307 Boetius, A., Boyd, P. W., Classen, A. T., Crowther, T. W., Danovaro, R., Foreman, C. M., Huisman,  
308 J., Hutchins, D. A., Jansson, J. K., Karl, D. M., Koskella, B., Mark Welch, D. B., . . . Webster,  
309 N. S. (2019). Scientists' warning to humanity: Microorganisms and climate change. *Nature Reviews*  
310 *Microbiology*, *17*, 569–586.
- 311 De Vargas, C., Audic, S., Henry, N., Decelle, J., Mahé, F., Logares, R., Lara, E., Berney, C., Le Bescot, N.,  
312 Probert, I., Carmichael, M., Poulain, J., Romac, S., Colin, S., Aury, J. M., Bittner, L., Chaffron, S.,  
313 Dunthorn, M., Engelen, S., . . . Velayoudon, D. (2015). Eukaryotic plankton diversity in the sunlit  
314 ocean. *Science*, *348*, 1261605.
- 315 Duarte, C. M. (2015). Seafaring in the 21st century: The Malaspina 2010 circumnavigation expedition.  
316 *Limnology and Oceanography Bulletin*, *24*, 11–14.
- 317 Geisen, S., Mitchell, E. A. D., Adl, S., Bonkowski, M., Dunthorn, M., Ekelund, F., Fernández, L. D.,  
318 Jousset, A., Krashevskaya, V., Singer, D., Spiegel, F. W., Walochnik, J., & Lara, E. (2018). Soil  
319 protists: A fertile frontier in soil biology research. *FEMS Microbiology Reviews*, *42*, 293–323.
- 320 Giner, C. R., Balagué, V., Krabberød, A. K., Ferrera, I., Reñé, A., Garcés, E., Gasol, J. M., Logares,  
321 R., & Massana, R. (2019). Quantifying long-term recurrence in planktonic microbial eukaryotes.  
322 *Molecular Ecology*, *28*, 923–935.
- 323 Giner, C. R., Pernice, M. C., Balagué, V., Duarte, C. M., Gasol, J. M., Logares, R., & Massana, R. (2020).  
324 Marked changes in diversity and relative activity of picoeukaryotes with depth in the world ocean.  
325 *ISME Journal*, *14*, 437–449.

- 326 Guillou, L., Bachar, D., Audic, S., Bass, D., Berney, C., Bittner, L., Boutte, C., Burgaud, G., de Vargas, C.,  
327 Decelle, J., del Campo, J., Dolan, J. R., Dunthorn, M., Edvardsen, B., Holzmann, M., Kooistra,  
328 W. H. C. F., Lara, E., Le Bescot, N., Logares, R., ... Christen, R. (2013). The Protist Ribosomal  
329 Reference database (PR<sup>2</sup>): A catalog of unicellular eukaryote Small Sub-Unit rRNA sequences with  
330 curated taxonomy. *Nucleic Acids Research*, *41*, D597–D604.
- 331 Ibarbalz, F. M., Henry, N., Brandão, M. C., Martini, S., Busseni, G., Byrne, H., Coelho, L. P., Endo, H.,  
332 Gasol, J. M., Gregory, A. C., Mahé, F., Rigonato, J., Royo-Llonch, M., Salazar, G., Sanz-Sáez, I.,  
333 Scalco, E., Soviadan, D., Zayed, A. A., Zingone, A., ... Zinger, L. (2019). Global trends in marine  
334 plankton diversity across kingdoms of life. *Cell*, *179*, 1084–1097.e21.
- 335 Kopf, A., Bicak, M., Kottmann, R., Schnetzer, J., Kostadinov, I., Lehmann, K., Fernandez-Guerra, A.,  
336 Jeanthon, C., Rahav, E., Ullrich, M., Wichels, A., Gerdts, G., Polymenakou, P., Kotoulas, G.,  
337 Siam, R., Abdallah, R. Z., Sonnenschein, E. C., Cariou, T., O’Gara, F., ... Glöckner, F. O. (2015).  
338 The ocean sampling day consortium. *GigaScience*, *4*, 27.
- 339 Lambert, S., Tragin, M., Lozano, J. C., Ghiglione, J. F., Vaultot, D., Bouget, F. Y., & Galand, P. E. (2019).  
340 Rhythmicity of coastal marine picoeukaryotes, bacteria and archaea despite irregular environmental  
341 perturbations. *ISME Journal*, *13*, 388–401.
- 342 Leblanc, K., Quéguiner, B., Diaz, F., Cornet, V., Michel-Rodriguez, M., Durrieu De Madron, X., Bowler,  
343 C., Malviya, S., Thyssen, M., Grégori, G., Rembauville, M., Grosso, O., Poulain, J., De Vargas, C.,  
344 Pujo-Pay, M., & Conan, P. (2018). Nanoplanktonic diatoms are globally overlooked but play a role  
345 in spring blooms and carbon export. *Nature Communications*, *9*, 953.
- 346 Logares, R., Deutschmann, I. M., Junger, P. C., Giner, C. R., Krabberød, A. K., Schmidt, T. S., Rubinat-  
347 Ripoll, L., Mestre, M., Salazar, G., Ruiz-González, C., Sebastián, M., De Vargas, C., Acinas, S. G.,  
348 Duarte, C. M., Gasol, J. M., & Massana, R. (2020). Disentangling the mechanisms shaping the  
349 surface ocean microbiota. *Microbiome*, *8*, 55.
- 350 Lopes dos Santos, A., Ribeiro Gérikas, C., Ong, D., Garczarek, L., Shi, X. L., Nodder, S., Vaultot, D.,  
351 & Gutierrez-Rodriguez, A. (2021). Phytoplankton diversity and ecology through the lens of high  
352 throughput sequencing technologies. *Advances in Phytoplankton Ecology. Applications of emerging*  
353 *technologies* (pp. 353–413). Elsevier.
- 354 Mahé, F., De Vargas, C., Bass, D., Czech, L., Stamatakis, A., Lara, E., Singer, D., Mayor, J., Bunge, J.,  
355 Sernaker, S., Siemsmeyer, T., Trautmann, I., Romac, S., Berney, C., Kozlov, A., Mitchell, E. A.,  
356 Seppely, C. V., Egge, E., Lentendu, G., ... Dunthorn, M. (2017). Parasites dominate hyperdiverse  
357 soil protist communities in Neotropical rainforests. *Nature Ecology and Evolution*, *1*, 0091.

- 358 Mahé, F., Rognes, T., Quince, C., de Vargas, C., & Dunthorn, M. (2014). Swarm: Robust and fast clustering  
359 method for amplicon-based studies. *PeerJ*, 2, e593.
- 360 Malviya, S., Scalco, E., Audic, S., Vincent, F., Veluchamy, A., Poulain, J., Wincker, P., Iudicone, D., De  
361 Vargas, C., Bittner, L., Zingone, A., & Bowler, C. (2016). Insights into global diatom distribution  
362 and diversity in the world's ocean. *Proceedings of the National Academy of Sciences of the United  
363 States of America*, 113, E1516–E1525.
- 364 Martin, M. (2011). Cutadapt removes adapter sequences from high-throughput sequencing reads. *EMB-  
365 net.journal*, 17, 10.
- 366 Massana, R., Gobet, A., Audic, S., Bass, D., Bittner, L., Boutte, C., Chambouvet, A., Christen, R., Claverie,  
367 J. M., Decelle, J., Dolan, J. R., Dunthorn, M., Edvardsen, B., Forn, I., Forster, D., Guillou, L.,  
368 Jaillon, O., Kooistra, W. H., Logares, R., . . . de Vargas, C. (2015). Marine protist diversity in  
369 European coastal waters and sediments as revealed by high-throughput sequencing. *Environmental  
370 Microbiology*, 17, 4035–4049.
- 371 McMurdie, P. J., & Holmes, S. (2013). Phyloseq: An R Package for Reproducible Interactive Analysis and  
372 Graphics of Microbiome Census Data. *PLoS ONE*, 8, e61217.
- 373 Metz, S., Huber, P., Accattatis, V., Lopes dos Santos, A., Bigeard, E., Unrein, F., Chambouvet, A., Not, F.,  
374 Lara, E., & Devercelli, M. (2021). Freshwater protists: Unveiling the unexplored in a large floodplain  
375 system. *Environmental Microbiology*, n/a.
- 376 Obiol, A., Muhovic, I., & Massana, R. (2021). Oceanic heterotrophic flagellates are dominated by a few  
377 widespread taxa. *Limnology and Oceanography*, n/a.
- 378 Pawlowski, J., Audic, S., Adl, S., Bass, D., Belbahri, L., Berney, C., Bowser, S. S., Cepicka, I., Decelle, J.,  
379 Dunthorn, M., Fiore-Donno, A. M., Gile, G. H., Holzmann, M., Jahn, R., Jirků, M., Keeling, P. J.,  
380 Kostka, M., Kudryavtsev, A., Lara, E., . . . de Vargas, C. (2012). CBOL Protist Working Group:  
381 Barcoding Eukaryotic Richness beyond the Animal, Plant, and Fungal Kingdoms. *Plos Biology*, 10,  
382 e1001419.
- 383 Piredda, R., Tomasino, M. P., D'Erchia, A. M., Manzari, C., Pesole, G., Montresor, M., Kooistra, W. H.,  
384 Sarno, D., & Zingone, A. (2017). Diversity and temporal patterns of planktonic protist assemblages  
385 at a Mediterranean Long Term Ecological Research site. *FEMS Microbiology Ecology*, 93, fiw200.
- 386 Quast, C., Pruesse, E., Yilmaz, P., Gerken, J., Schweer, T., Yarza, P., Peplies, J., & Glöckner, F. O. (2013).  
387 The SILVA ribosomal RNA gene database project: Improved data processing and web-based tools.  
388 *Nucleic Acids Research*, 41, D590–D596.
- 389 R Development Core Team. (2013). *R: A language and environment for statistical computing*.

- 390 Sali, A., & Attali, D. (2020). *Shinycssloaders: Add loading animations to a 'shiny' output while it's recal-*  
391 *culating.*
- 392 Santoferrara, L., Burki, F., Filker, S., Logares, R., Dunthorn, M., & McManus, G. B. (2020). Perspec-  
393 tives from ten years of protist studies by High-Throughput metabarcoding. *Journal of Eukaryotic*  
394 *Microbiology*, 67, 612–622.
- 395 Santoferrara, L. F. (2019). Current practice in plankton metabarcoding: Optimization and error manage-  
396 ment. *Journal of Plankton Research*, 41, 571–582.
- 397 Schneider, L., Anestis, K., Mansour, J., Anschütz, A., Gypens, N., Hansen, P., John, U., Klemm, K.,  
398 Martin, J., Medic, N., Not, F., & Stolte, W. (2020). A dataset on trophic modes of aquatic  
399 protists. *Biodiversity Data Journal*, 8.
- 400 Singer, D., Seppey, C. V., Lentendu, G., Dunthorn, M., Bass, D., Belbahri, L., Blandenier, Q., Debroas, D.,  
401 de Groot, G. A., de Vargas, C., Domaizon, I., Duckert, C., Izaguirre, I., Koenig, I., Mataloni, G.,  
402 Schiaffino, M. R., Mitchell, E. A., Geisen, S., & Lara, E. (2021). Protist taxonomic and functional  
403 diversity in soil, freshwater and marine ecosystems. *Environment International*, 146, 106262.
- 404 Sommeria-Klein, G., Watteaux, R., Ibarbalz, F. M., Pierella Karlusich, J. J., Iudicone, D., Bowler, C., &  
405 Morlon, H. (2021). Global drivers of eukaryotic plankton biogeography in the sunlit ocean. *Science*,  
406 374, 594–599.
- 407 Stoeck, T., Bass, D., Nebel, M., Christen, R., Jones, M. D. M., Breiner, H. W., & Richards, T. A. (2010).  
408 Multiple marker parallel tag environmental DNA sequencing reveals a highly complex eukaryotic  
409 community in marine anoxic water. *Molecular Ecology*, 19, 21–31.
- 410 Stoeck, T., Behnke, A., Christen, R., Amaral-Zettler, L., Rodriguez-Mora, M. J., Chistoserdov, A., Orsi, W.,  
411 & Edgcomb, V. P. (2009). Massively parallel tag sequencing reveals the complexity of anaerobic  
412 marine protistan communities. *BMC Biology*, 7, 72.
- 413 Taberlet, P., Coissac, E., Pompanon, F., Brochmann, C., & Willerslev, E. (2012). Towards next-generation  
414 biodiversity assessment using DNA metabarcoding. *Molecular Ecology*, 21, 2045–2050.
- 415 Thompson, L. R., Sanders, J. G., McDonald, D., Amir, A., Ladau, J., Locey, K. J., Prill, R. J., Tripathi, A.,  
416 Gibbons, S. M., Ackermann, G., Navas-Molina, J. A., Janssen, S., Kopylova, E., Vázquez-Baeza,  
417 Y., González, A., Morton, J. T., Mirarab, S., Zech Xu, Z., Jiang, L., ... Knight, R. (2017). A  
418 communal catalogue reveals Earth's multiscale microbial diversity. *Nature*, 551, 457–463.
- 419 Tragin, M., & Vaulot, D. (2018). Green microalgae in marine coastal waters: The Ocean Sampling Day  
420 (OSD) dataset. *Scientific Reports*, 8, 14020.
- 421 Travers, C. (2021). *Qs R package. Quick Serialization of R Objects.*



422 Yau, S., Lopes dos Santos, A., Eikrem, W., G erikas Ribeiro, C., Gourvil, P., Balzano, S., Escande, M. L.,  
423 Moreau, H., & Vaultot, D. (2020). *Mantoniella beaufortii* and *Mantoniella baffinensis* sp. nov.  
424 (Mamiellales, Mamiellophyceae), two new green algal species from the high arctic1. *Journal of*  
425 *Phycology*, 56, 37–51.

**Table 1:** List of eukaryotic datasets and studies included in the metaPR2 databases. The column 'Reads' corresponds to mean number of reads per sample.

| ID  | Name                                                              | Area                      | Ecosystem         | Substrate                        | Samples | Technology     | Reads   | ASVs  | Bioproject               | DOI                             |
|-----|-------------------------------------------------------------------|---------------------------|-------------------|----------------------------------|---------|----------------|---------|-------|--------------------------|---------------------------------|
| 1   | Ocean Sampling Day - 2014 - V4 LGC                                | Ocean survey              | coastal           | water                            | 158     | Illumina       | 31258   | 6557  | PRJEB8682                | 10.1186/s13742-015-0066-5       |
| 2   | Ocean Sampling Day - 2015 - V4                                    | Ocean survey              | coastal           | water                            | 139     | Illumina       | 62575   | 6033  |                          | 10.1186/s13742-015-0066-5       |
| 3   | Ocean Sampling Day - 2014 - V4 LW                                 | Ocean survey              | coastal           | water                            | 33      | Illumina       | 313694  | 5872  |                          | 10.1186/s13742-015-0066-5       |
| 5   | Arctic Ocean, Beaufort Sea, MALINA Arctic Ocean cruise - 2009     | Arctic Ocean              | oceanic           | water                            | 24      | 454            | 6704    | 270   | PRJNA202104              | 10.1038/ismej.2014.197          |
| 6   | Arctic Ocean Central - 2012                                       | Arctic Ocean              | oceanic           | ice                              | 8       | 454            | 36628   | 182   | PRJEB7577                | 10.1080/09670262.2015.1077395   |
| 9   | Arctic Nansen Basin - 2012                                        | Arctic Ocean              | oceanic           | water                            | 17      | 454            | 13700   | 328   | PRJEB11449               | 10.1371/journal.pone.0148512    |
| 11  | Antarctic Fjeldes Bay - 2013                                      | Southern Ocean            | coastal           | water                            | 10      | Illumina       | 13631   | 69    | PRJNA254097              | 10.1007/s00300-015-1815-8       |
| 15  | Tara Oceans - 2009-2012                                           | Ocean survey              | oceanic           | water                            | 898     | Illumina       | 1069869 | 19975 | PRJEB6610                | 10.1126/science.1261605         |
| 16  | Antarctic Fjeldes Bay 2015 18S V4                                 | Southern Ocean            | coastal           | water                            | 123     | Illumina       | 48288   | 689   | PRJNA645244              | 10.1038/s41598-020-80568-8      |
| 18  | Antarctic Fjeldes Bay 2015 18S V4 sorted                          | Southern Ocean            | coastal           | sorted phytoplankton             | 60      | Illumina       | 31615   | 280   | PRJNA645244              | 10.1038/s41598-020-80568-8      |
| 19  | Baltic Sea Gulf of Finland - 2012-2013                            | Baltic Sea                | coastal           | water, ice                       | 73      | Illumina       | 71195   | 933   | PRJEB21047               | 10.3354/meps12645               |
| 20  | Norway Oslo fjord - TS - 2009-2011                                | Atlantic Ocean            | coastal           | water                            | 78      | 454            | 4822    | 806   | PRJNA497792              | 10.1111/jeu.12700               |
| 34  | Malaspina expedition - vertical profiles - Ocean survey 2010-2011 | Ocean survey              | oceanic           | water                            | 179     | Illumina       | 78420   | 6075  | PRJEB23771               | 10.1038/s41396-019-0506-9       |
| 35  | Malaspina expedition - surface - 2010-2011                        | Ocean survey              | oceanic           | water                            | 124     | Illumina       | 194174  | 7059  | PRJEB23913               | 10.1186/s40168-020-00827-8      |
| 36  | Spain Blanes Time Series - 2004-2013                              | Mediterranean Sea         | coastal           | water                            | 289     | Illumina       | 78880   | 9141  | PRJEB23788               | 10.1111/mec.14929               |
| 37  | Arctic Baffin Bay - 2013                                          | Arctic Ocean              | oceanic           | water                            | 32      | Illumina       | 36046   | 518   | PRJNA363398              | 10.1038/s41598-018-27705-6      |
| 38  | Arctic White Sea - 2013-2015                                      | Arctic Ocean              | oceanic           | ice                              | 17      | Illumina       | 24210   | 385   | PRJNA368621              | 10.1007/s00248-017-1076-x       |
| 39  | Arctic Polarstern expedition ARK-XXVIII/3 - 2012                  | Arctic Ocean              | oceanic           | water, ice, ice-algal aggregates | 45      | Illumina       | 74029   | 987   | PRJEB23005               | 10.3389/fmcb.2018.01035.        |
| 40  | Arctic Ocean Survey - 2005-2011                                   | Arctic Ocean              | oceanic           | water                            | 36      | 454            | 7136    | 467   | PRJNA243055              | 10.1128/AEM.02737-14            |
| 41  | Chukchi Sea - ICESCAPE - 2010                                     | Arctic Ocean              | oceanic           | water                            | 23      | 454            | 5799    | 259   | PRJNA217438              | 10.1128/AEM.02737-14            |
| 42  | Arctic Nares Strait - 2014                                        | Arctic Ocean              | oceanic           | water                            | 247     | Illumina       | 36708   | 1533  | PRJEB24314               | 10.3389/fmars.2019.00479        |
| 43  | Baltic Sea Gdansk Gulf - 2012                                     | Baltic Sea                | coastal           | water                            | 35      | 454            | 3461    | 267   | PRJEB23971               | 10.1002/lno.11177               |
| 49  | Italy Bay of Naples - 2011                                        | Mediterranean Sea         | coastal           | water                            | 8       | Illumina       | 213716  | 2255  | PRJEB24595               | 10.1093/femsec/fiw200           |
| 53  | European coast Biomarks 2009                                      | coast of Europe           | coastal           | water, sediments                 | 139     | 454            | 8720    | 1155  | PRJEB9133                | 10.1016/j.cub.2014.02.050       |
| 69  | Mariana Trench 2016 1                                             | Mariana Trench            | oceanic           | water                            | 32      | Illumina       | 53391   | 2800  | PRJNA451086              | 10.1038/s41598-018-33790-4      |
| 70  | Mariana Trench 2016 2                                             | Mariana Trench            | oceanic           | water                            | 12      | Illumina       | 15713   | 213   | PRJNA399026              | 10.3389/fmcb.2018.02023         |
| 150 | River Saint-Charles 2016-2017                                     | Saint-Charles River       | freshwater rivers | water                            | 145     | Illumina       | 8498    | 862   | PRJNA486319              | 10.3389/fmcb.2019.02359         |
| 183 | Lake Fuxian 2015                                                  | Lake Fuxian               | freshwater lakes  | water                            | 17      | Illumina       | 67202   | 764   | PRJNA534173              | 10.3389/fmcb.2019.02016         |
| 185 | Lake Chaohu 2014-2015                                             | Lake Chaohu               | freshwater lakes  | water                            | 24      | Illumina       | 63312   | 999   | PRJNA534176, PRJNA330896 | 10.1016/j.scitotenv.2019.134803 |
| 195 | Lake Baikal 2013                                                  | Siberia                   | freshwater lakes  | water                            | 23      | Illumina       | 66056   | 431   | PRJEB24415               | 10.3390/microorganisms8040543   |
| 196 | Lake Chevreuse France 2012                                        | Europe                    | freshwater lakes  | water                            | 12      | 454            | 8480    | 124   | PRJNA259710              | 10.1111/1462-2920.12591         |
| 197 | Lakes mountain 2013                                               | Austria Chile Ethiopia    | freshwater lakes  | water                            | 19      | Illumina       | 54102   | 608   | PRJNA299108              | 10.1111/mec.13633               |
| 198 | Lake Garda                                                        | Italy                     | freshwater lakes  | water                            | 64      | Illumina       | 53628   | 628   | PRJEB36925               | 10.3389/fmcb.2020.00789         |
| 199 | Soils Neotropical                                                 | Central and South America | terrestrial       | soil                             | 175     | Illumina Miseq | 378928  | 10686 | PRJNA317860              | 10.1038/s41559-017-0091         |
| 200 | River Parana                                                      | South America             | freshwater rivers | water                            | 10      | Illumina       | 137981  | 1385  | PRJEB23471               | 10.3389/fevo.2018.00099         |

**Table 1:** (continued)

| ID  | Name              | Area         | Ecosystem        | Substrate | Samples | Technology     | Reads  | ASVs | Bioproject | DOI                          |
|-----|-------------------|--------------|------------------|-----------|---------|----------------|--------|------|------------|------------------------------|
| 201 | Soils Swiss       | Swiss Alps   | terrestrial      | soil      | 585     | Illumina       | 31557  | 9640 | PRJEB30010 | 10.1111/jpi.13755            |
| 202 | Lakes Argentina   | Global       | freshwater lakes | water     | 15      | Illumina HiSeq | 272112 | 1648 | PRJEB41211 | 10.1016/j.envint.2020.106262 |
| 203 | Lakes Scandinavia | Scandinavia  | freshwater lakes | water     | 87      | 454            | 3077   | 301  |            | 10.1093/femsec/fiw231        |
| 204 | Soils Global 2012 | Global       | terrestrial      | soil      | 40      | 454            | 873    | 120  |            | 10.1038/ismej.2012.147       |
| 205 | Tara Ocean V4     | Ocean survey | oceanic          | water     | 104     | Illumina       | 198981 | 9009 | PRJEB6610  | 10.1016/j.cell.2019.10.008   |
| 206 | Tara Arctic V4    | Arctic Ocean | oceanic          | water     | 28      | Illumina       | 156105 | 1416 | PRJEB9737  | 10.1016/j.cell.2019.10.008   |

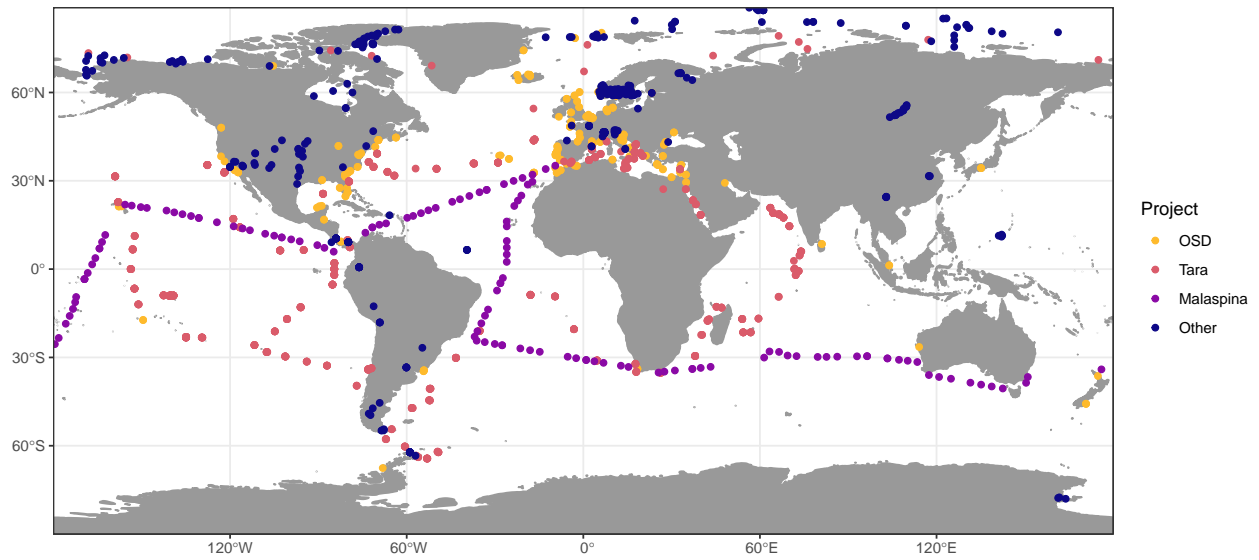

**Figure 1:** Map of stations included in the metaPR<sup>2</sup> database.

Number of samples

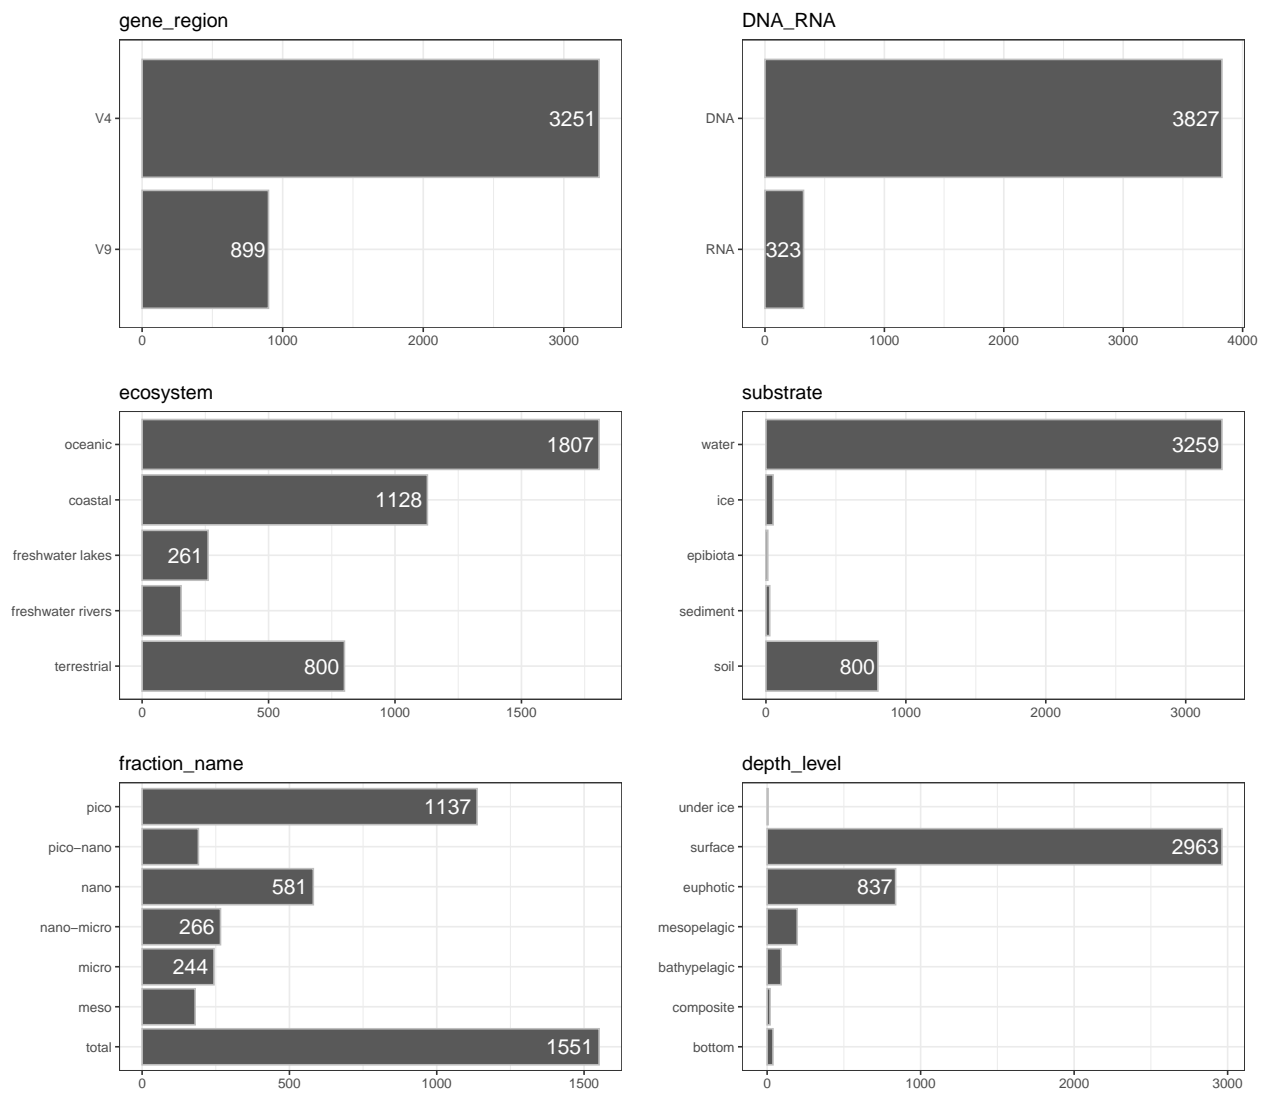

**Figure 2:** Distribution of samples by gene region, DNA or RNA, ecosystem, substrate, fraction name and depth level.

Reads

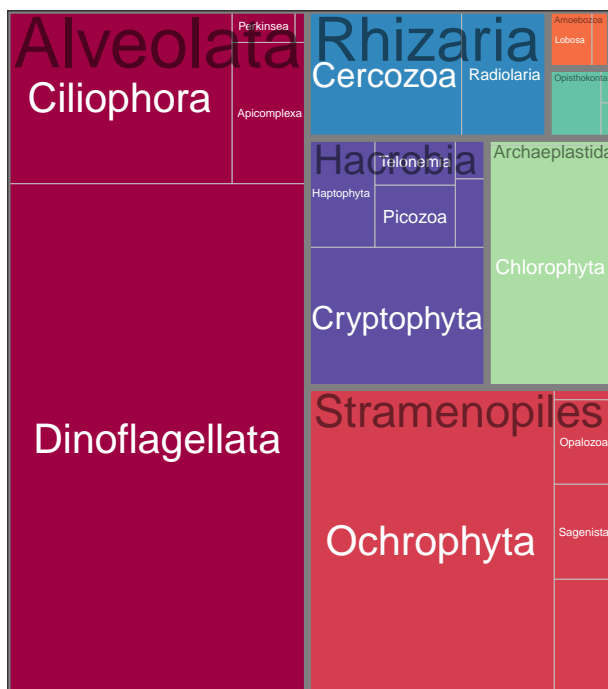

cASVs

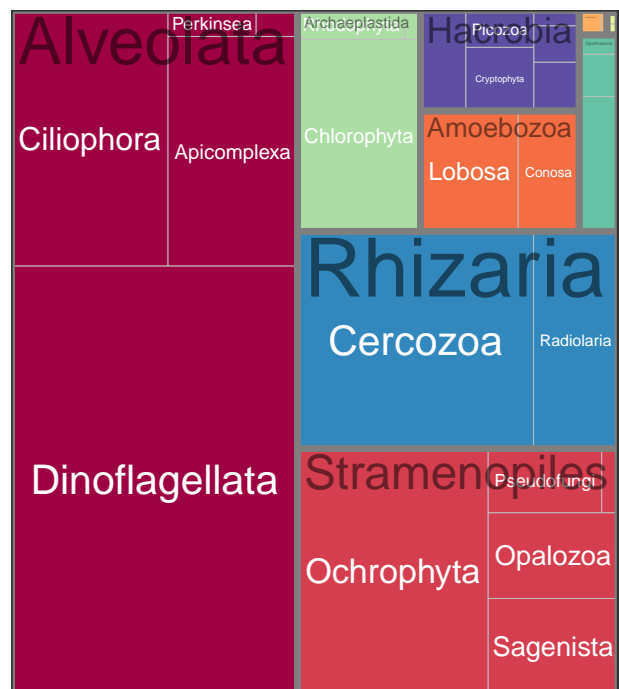

**Figure 3:** Treemaps of most abundant protist taxa (supergroup and division) for V4 datasets based on number of reads after normalization (left) or number of cASVs (right).

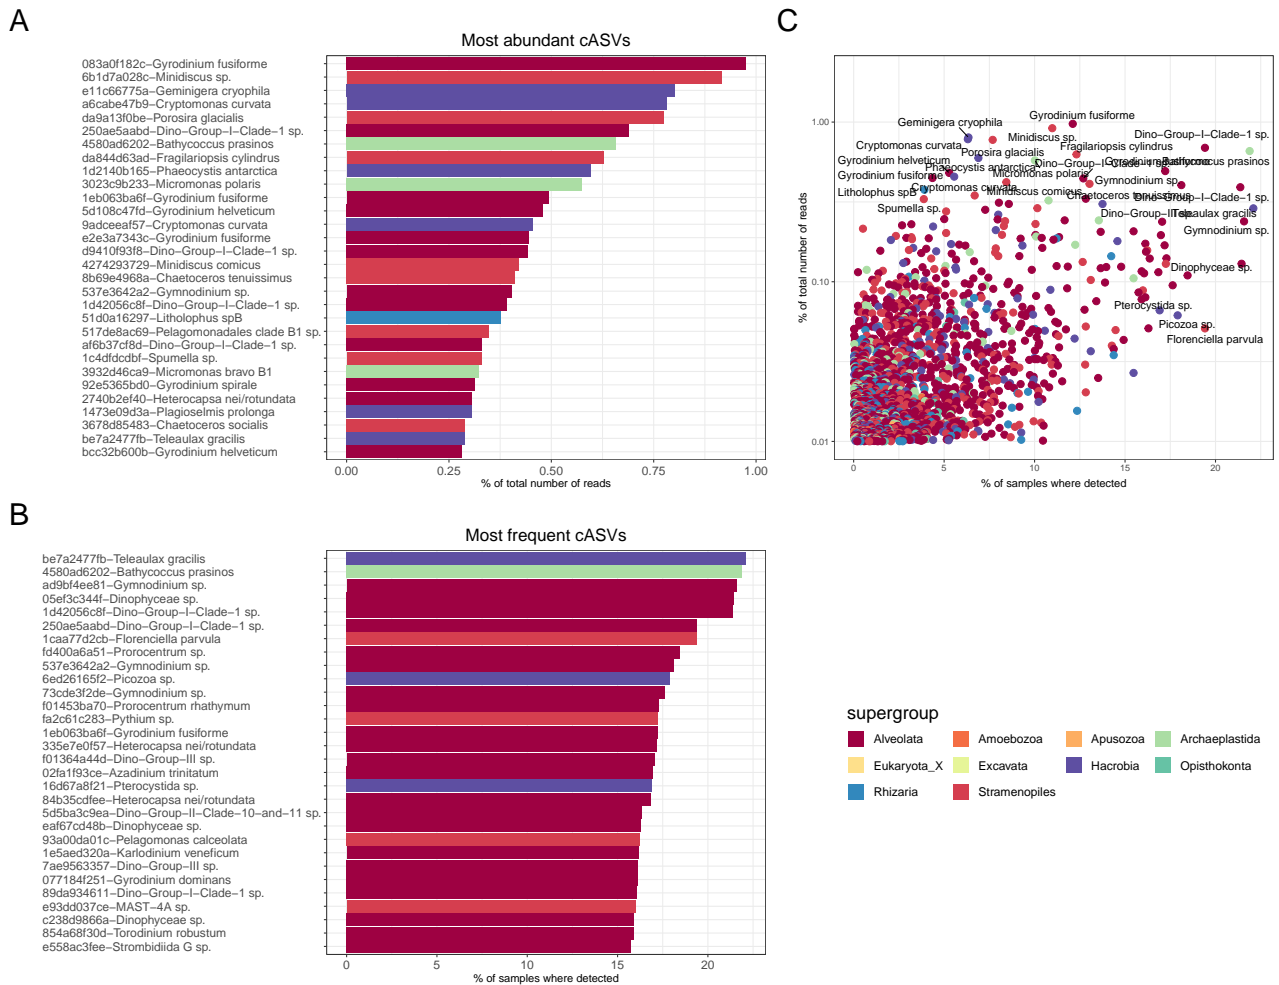

**Figure 4:** Protist V4 cASVs. A. Most abundant cASVs (after normalisation per sample). B. Most frequent cASVs. C. Relationships between cASV frequency and abundance. Each cASV is coded by a 10-letter string representing the start of the 40-character hash value of the sequence (see Material and Methods).

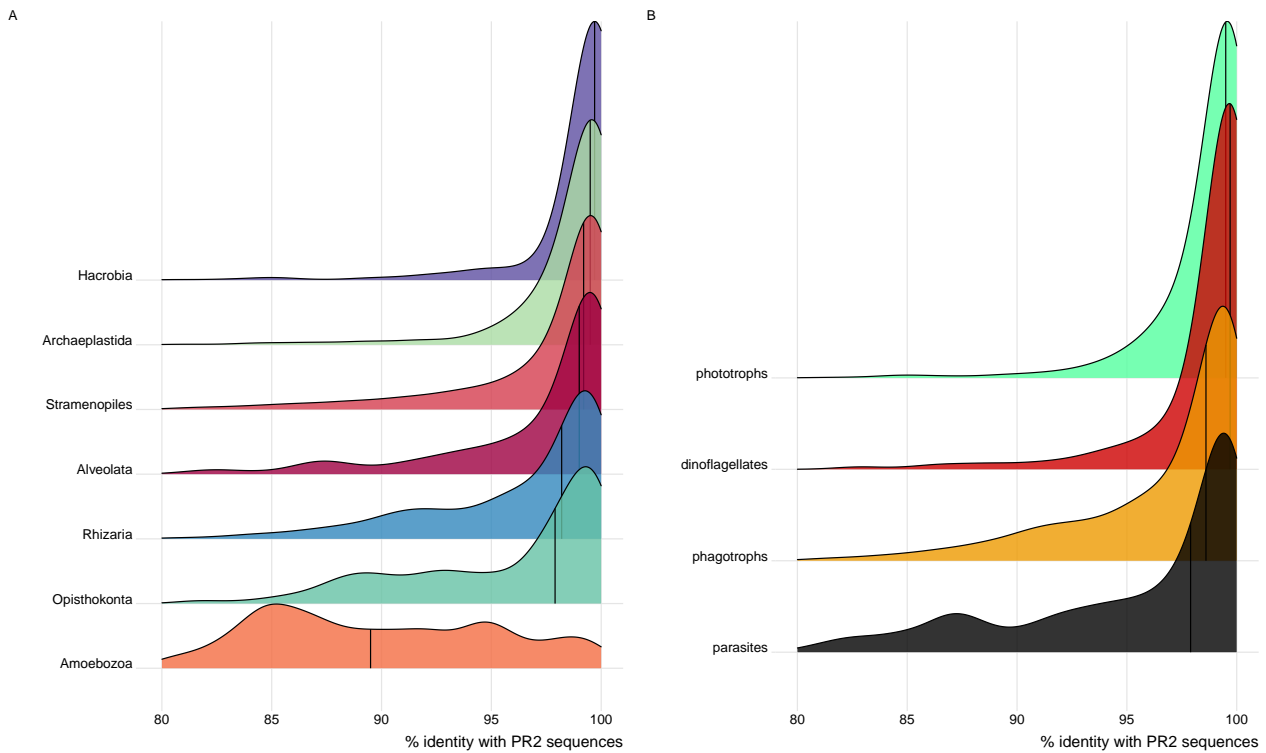

**Figure 5:** Protist V4 cASVs. Similarity of cASVs to sequences for the sequences from the PR<sup>2</sup> database as a function of supergroup (A) and of the ecological function (B).

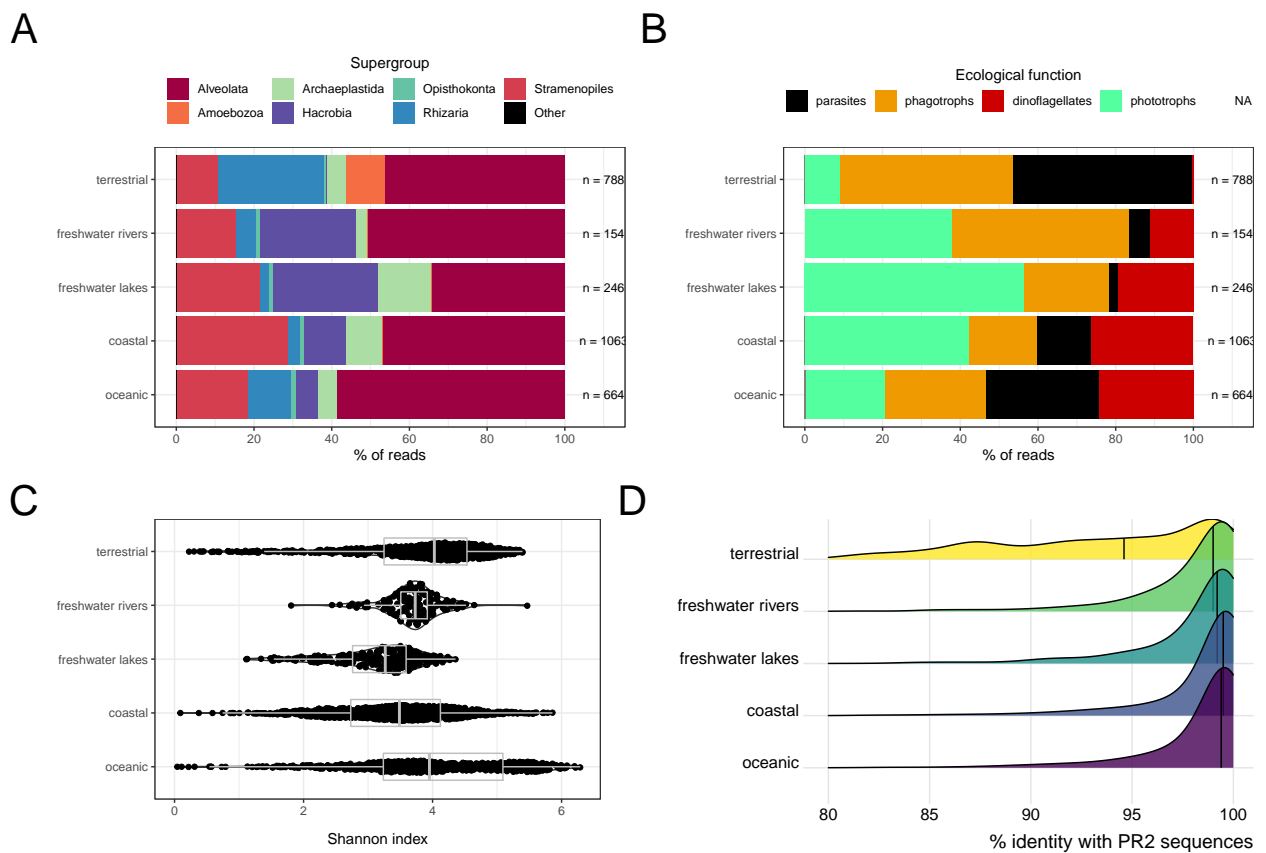

**Figure 6:** Protist V4 cASVs. Composition as a function of the environment based on taxonomy (A) or on ecological function (B) and Shannon index (C). Similarity of cASVs to sequences for the sequences from the PR<sup>2</sup> database as a function of the environment (D).



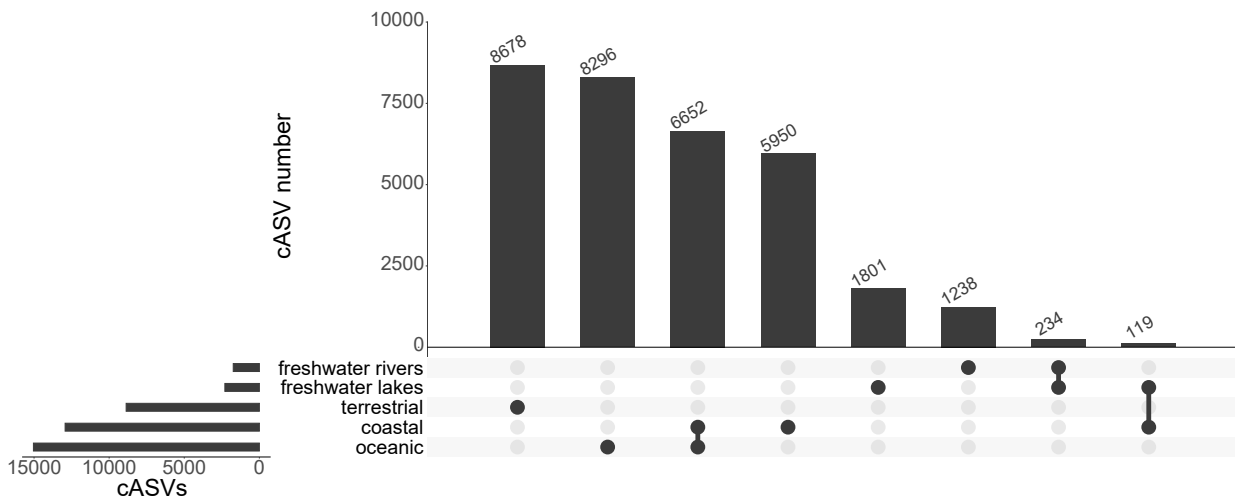

**Figure 7:** Protist V4 cASVs found on one or more environments (so-called "upset" plot).

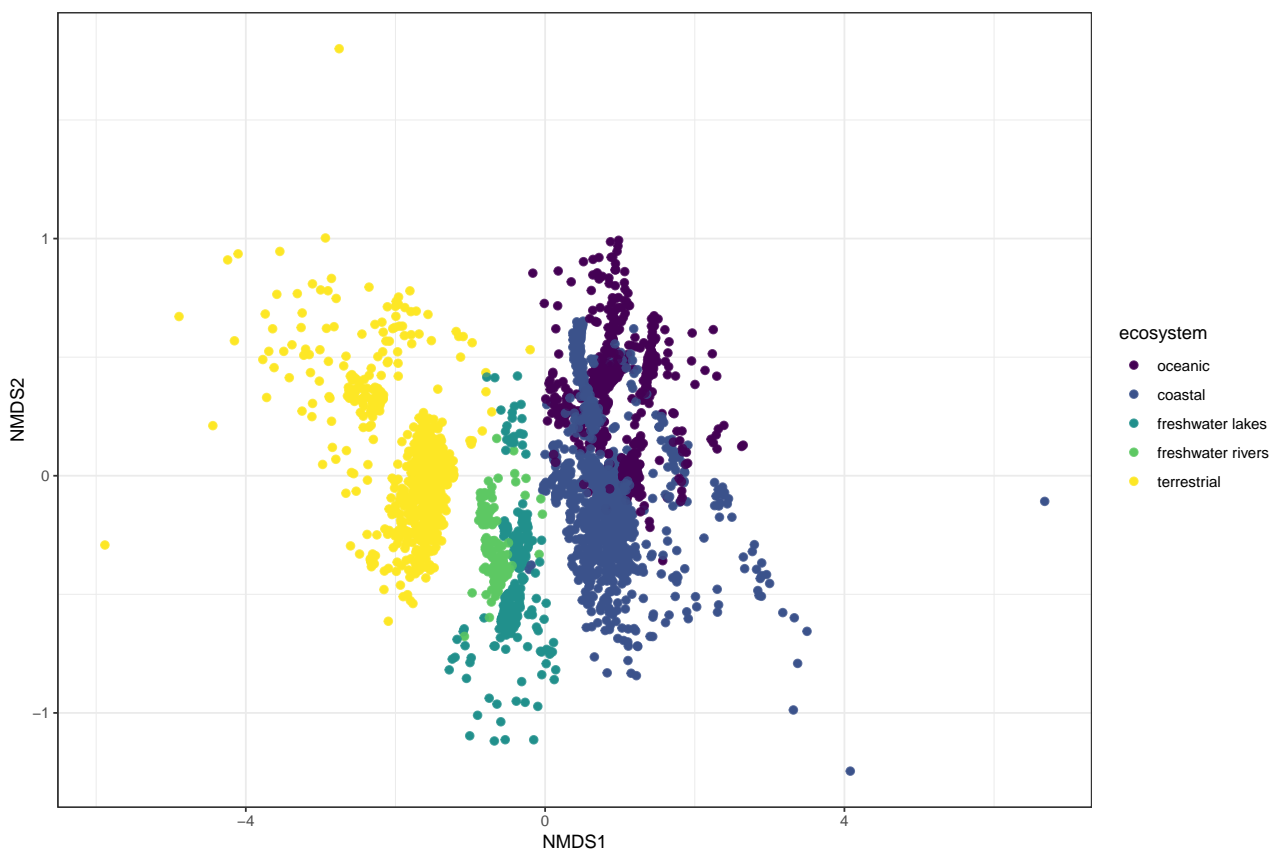

**Figure 8:** Protist V4 cASVs. NMDS analysis. Colour correspond to sample environment.

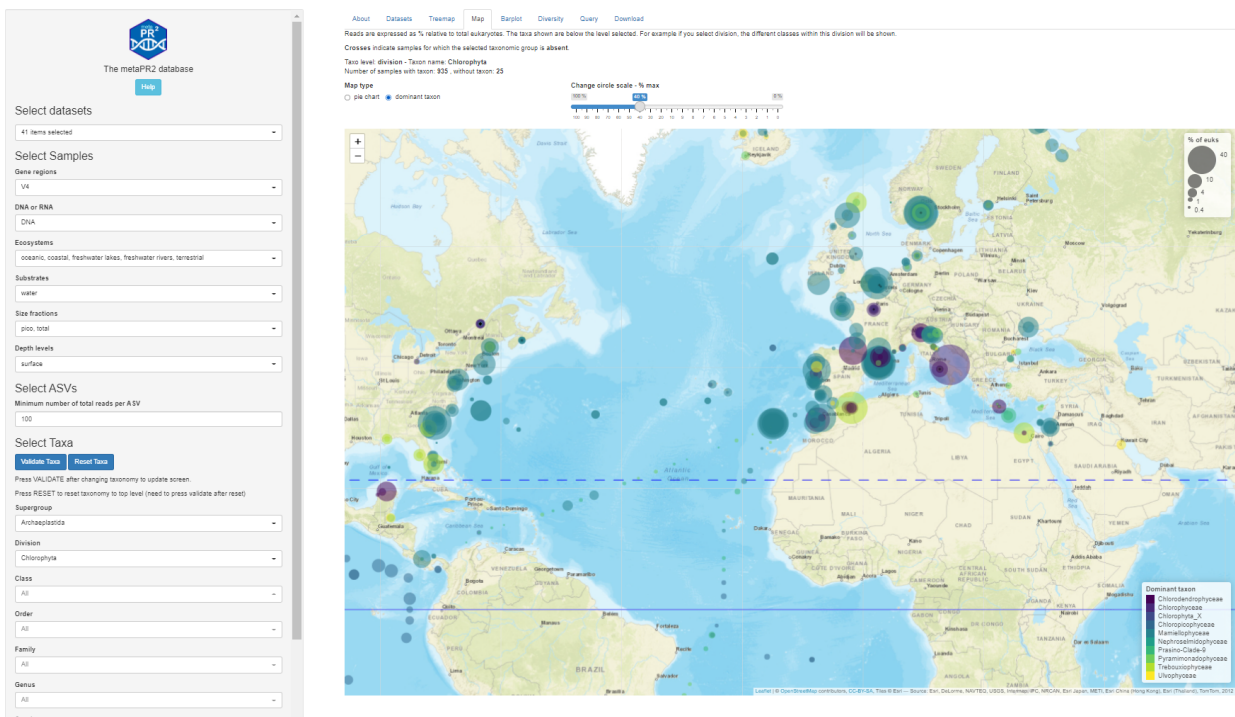

**Figure 9:** The metaPR<sup>2</sup> shiny application available at <https://shiny.metapr2.org>.

# metaPR<sup>2</sup>: a database of eukaryotic 18S rRNA metabarcodes with an emphasis on protists.

426

427

428 Daniel Vaultot <sup>1,2</sup> ✉ , Clarence Wei Hung Sim<sup>2</sup>, Denise Ong<sup>2</sup> , Bryan Teo<sup>2</sup>, Charlie Biber<sup>3</sup>,  
429 Mahwash Jamy<sup>3</sup>, Adriana Lopes dos Santos <sup>2</sup> 

430

431 <sup>1</sup> UMR 7144, ECOMAP, CNRS, Sorbonne Université, Station Biologique de Roscoff, 29680  
432 Roscoff, France

433 <sup>2</sup> Asian School of the Environment, Nanyang Technological University, 50 Nanyang Avenue,  
434 Singapore 639798

435 <sup>3</sup> Department of Organismal Biology (Systematic Biology), Uppsala University, Uppsala,  
436 Sweden

## 437 ORCID

- 438 ■ Daniel Vaultot: 0000-0002-0717-5685
- 439 ■ Adriana Lopes dos Santos: 0000-0002-0736-4937
- 440 ■ Denise Ong: 0000-0001-6053-6948
- 441 ■ Clarence Wei Hung Sim: 0000-0003-2190-7261
- 442 ■ Mahwash Jamy: 0000-0002-2930-9226

443 ✉ Corresponding author: vaultot@gmail.com

444 Date: February 7, 2022

445 **Keywords:** 18S rRNA, metabarcodes, database, R, shiny, PCR, protists

446 **Short title:** metaPR<sup>2</sup> - a database of eukaryotic metabarcodes

447 **Supplementary Material**

**Table S1:** Ecological function of taxa according to Table S2 of Sommeria-Klein et al. (2021). Taxa present in the PR2 database for which ecological function was not present in Table S2 were assigned an ecological function based on the literature. Ecological function was propagated to all taxa below the taxon for which it was defined using an R script.

| Taxon                 | Taxonomic level | Function        | Reference                  |
|-----------------------|-----------------|-----------------|----------------------------|
| Acantharea            | class           | phagotrophs     | Sommeria-Klein et al. 2021 |
| Annelida              | class           | metazoans       | Sommeria-Klein et al. 2021 |
| Apicomplexa           | class           | parasites       | Sommeria-Klein et al. 2021 |
| Arthropoda            | class           | metazoans       | Sommeria-Klein et al. 2021 |
| Endomyxa-Ascetosporea | class           | parasites       | Sommeria-Klein et al. 2021 |
| Ascomycota            | class           | phagotrophs     | Sommeria-Klein et al. 2021 |
| Bacillariophyta       | class           | phototrophs     | Sommeria-Klein et al. 2021 |
| Basidiomycota         | class           | phagotrophs     | Sommeria-Klein et al. 2021 |
| Bicoecea              | class           | phagotrophs     | Sommeria-Klein et al. 2021 |
| Bolidophyceae         | class           | phototrophs     | Sommeria-Klein et al. 2021 |
| Bryozoa               | class           | metazoans       | Sommeria-Klein et al. 2021 |
| Centrohelida          |                 | phagotrophs     | Sommeria-Klein et al. 2021 |
| Chaetognatha          | class           | metazoans       | Sommeria-Klein et al. 2021 |
| Chlorarachniophyceae  | class           | phototrophs     | Sommeria-Klein et al. 2021 |
| Chlorophyceae         | class           | phototrophs     | Sommeria-Klein et al. 2021 |
| Chloropicophyceae     | class           | phototrophs     | Sommeria-Klein et al. 2021 |
| Choanoflagellata      | class           | phagotrophs     | Sommeria-Klein et al. 2021 |
| Chordata              |                 | metazoans       | Sommeria-Klein et al. 2021 |
| Chromodellids         | division        | phagotrophs     | Sommeria-Klein et al. 2021 |
| Chrysophyceae         | class           | phototrophs     | Sommeria-Klein et al. 2021 |
| Chytridiomycota       | class           | parasites       | Sommeria-Klein et al. 2021 |
| Ciliophora            | division        | phagotrophs     | Sommeria-Klein et al. 2021 |
| Cnidaria              | class           | metazoans       | Sommeria-Klein et al. 2021 |
| Collodaria            |                 |                 | Sommeria-Klein et al. 2021 |
| Cryomonadida          | class           | phagotrophs     | Sommeria-Klein et al. 2021 |
| Cryptophyta           | division        | phototrophs     | Sommeria-Klein et al. 2021 |
| Ctenophora            | class           | metazoans       | Sommeria-Klein et al. 2021 |
| Dactylopodida         | order           | parasites       | Sommeria-Klein et al. 2021 |
| Dictyochophyceae      | class           | phototrophs     | Sommeria-Klein et al. 2021 |
| Dinophyceae           | class           | dinoflagellates | Sommeria-Klein et al. 2021 |
| Diplonemida           | order           | phagotrophs     | Sommeria-Klein et al. 2021 |
| Ebriida               | order           | phagotrophs     | Sommeria-Klein et al. 2021 |

**Table S1:** (continued)

| Taxon               | Taxonomic level | Function    | Reference                  |
|---------------------|-----------------|-------------|----------------------------|
| Echinodermata       | class           | metazoans   | Sommeria-Klein et al. 2021 |
| Eucyrtidium         | genus           | phagotrophs | Sommeria-Klein et al. 2021 |
| Euglenida           | class           | phagotrophs | Sommeria-Klein et al. 2021 |
| Foraminifera        | division        | phagotrophs | Sommeria-Klein et al. 2021 |
| Haptophyta          | division        | phototrophs | Sommeria-Klein et al. 2021 |
| Katablepharidophyta | division        | phagotrophs | Sommeria-Klein et al. 2021 |
| Kinetoplastea       | class           | parasites   | Sommeria-Klein et al. 2021 |
| Labyrinthulomycetes | class           | phagotrophs | Sommeria-Klein et al. 2021 |
| Dino-Group-I        | order           | parasites   | Sommeria-Klein et al. 2021 |
| Dino-Group-II       | order           | parasites   | Sommeria-Klein et al. 2021 |
| Dino-Group-III      | order           | parasites   | Sommeria-Klein et al. 2021 |
| Dino-Group-IV       | order           | parasites   | Sommeria-Klein et al. 2021 |
| Dino-Group-V        | order           | parasites   | Sommeria-Klein et al. 2021 |
| Mamiellophyceae     | class           | phototrophs | Sommeria-Klein et al. 2021 |
| MAST-1              | class           | phagotrophs | Sommeria-Klein et al. 2021 |
| MAST-10             | class           | phagotrophs | Sommeria-Klein et al. 2021 |
| MAST-11             | class           | phagotrophs | Sommeria-Klein et al. 2021 |
| MAST-12             | class           | phagotrophs | Sommeria-Klein et al. 2021 |
| MAST-3              | class           | phagotrophs | Sommeria-Klein et al. 2021 |
| MAST-4              | class           | phagotrophs | Sommeria-Klein et al. 2021 |
| MAST-6              | class           | phagotrophs | Sommeria-Klein et al. 2021 |
| MAST-7              | class           | phagotrophs | Sommeria-Klein et al. 2021 |
| MAST-8              | class           | phagotrophs | Sommeria-Klein et al. 2021 |
| MAST-9              | class           | phagotrophs | Sommeria-Klein et al. 2021 |
| Mesomycetozoa       | division        | parasites   | Sommeria-Klein et al. 2021 |
| MOCH-1              | class           | phototrophs | Sommeria-Klein et al. 2021 |
| MOCH-2              | class           | phototrophs | Sommeria-Klein et al. 2021 |
| Mollusca            | class           | metazoans   | Sommeria-Klein et al. 2021 |
| Nassellaria         | order           | phagotrophs | Sommeria-Klein et al. 2021 |
| Nemertea            | class           | metazoans   | Sommeria-Klein et al. 2021 |
| Oomycota            | class           | parasites   | Sommeria-Klein et al. 2021 |
| Pelagophyceae       | class           | phototrophs | Sommeria-Klein et al. 2021 |
| Phaeodaria          |                 | phagotrophs | Sommeria-Klein et al. 2021 |
| Picomonadida        |                 | phagotrophs | Sommeria-Klein et al. 2021 |
| Platyhelminthes     | class           | metazoans   | Sommeria-Klein et al. 2021 |

**Table S1:** (continued)

| Taxon               | Taxonomic level | Function    | Reference                  |
|---------------------|-----------------|-------------|----------------------------|
| Porifera            | class           | metazoans   | Sommeria-Klein et al. 2021 |
| Pyramimonadophyceae | class           | phototrophs | Sommeria-Klein et al. 2021 |
| RAD-A               | class           | phagotrophs | Sommeria-Klein et al. 2021 |
| RAD-B               | class           | phagotrophs | Sommeria-Klein et al. 2021 |
| RAD-C               | class           | phagotrophs | Sommeria-Klein et al. 2021 |
| Rhodophyta          | division        | phototrophs | Sommeria-Klein et al. 2021 |
| Spumellaria         | order           | phagotrophs | Sommeria-Klein et al. 2021 |
| Streptophyta        | division        | phototrophs | Sommeria-Klein et al. 2021 |
| Telonemia           | division        | phagotrophs | Sommeria-Klein et al. 2021 |
| Trebouxiophyceae    | class           | phototrophs | Sommeria-Klein et al. 2021 |
| Vannellida          | order           | phagotrophs | Sommeria-Klein et al. 2021 |
| Amoebozoa           | supergroup      | parasites   | Literature                 |
| Perkinsea           | division        | parasites   | Literature                 |
| Alveolata_X         | division        | parasites   | Literature                 |
| Dinoflagellata      | division        | phagotrophs | Literature                 |
| Apusozoa            | supergroup      | phagotrophs | Literature                 |
| Chlorophyta         | division        | phototrophs | Literature                 |
| Glaucochyta         | division        | phototrophs | Literature                 |
| Prasinodermophyta   | division        | phototrophs | Literature                 |
| Centroheliozoa      | division        | phagotrophs | Literature                 |
| Metamonada          | division        | parasites   | Literature                 |
| Picozoa             | division        | phagotrophs | Literature                 |
| Choanoflagellida    | division        | phagotrophs | Literature                 |
| Fungi               | division        | parasites   | Literature                 |
| Metazoa             | division        | metazoans   | Literature                 |
| Cercozoa            | division        | phagotrophs | Literature                 |
| Aurearenophyceae    | class           | phototrophs | Literature                 |
| Chrysomerophyceae   | class           | phototrophs | Literature                 |
| Eustigmatophyceae   | class           | phototrophs | Literature                 |
| MOCH-3              | class           | phototrophs | Literature                 |
| MOCH-4              | class           | phototrophs | Literature                 |
| MOCH-5              | class           | phototrophs | Literature                 |
| Phaeophyceae        | class           | phototrophs | Literature                 |
| Ochrophyta          | division        | phototrophs | Literature                 |
| Pinguiphyceae       | class           | phototrophs | Literature                 |

**Table S1:** (continued)

| Taxon            | Taxonomic level | Function    | Reference  |
|------------------|-----------------|-------------|------------|
| Raphidophyceae   | class           | phototrophs | Literature |
| Synchromophyceae | class           | phototrophs | Literature |
| Synurophyceae    | class           | phototrophs | Literature |
| Xanthophyceae    | class           | phototrophs | Literature |
| MAST-16          | class           | phagotrophs | Literature |
| MAST-22          | class           | phagotrophs | Literature |
| MAST-24          | class           | phagotrophs | Literature |
| Opalozoa         | division        | parasites   | Literature |
| Pseudofungi      | division        | parasites   | Literature |
| Sagenista        | division        | phagotrophs | Literature |
| Stramenopiles    | supergroup      | phagotrophs | Literature |
| Discoba          | division        | parasites   | Literature |
| Archaeplastida   | supergroup      | phototrophs | Literature |
| Eukaryota_X      | supergroup      | parasites   | Literature |
| Malawimonadidae  | division        | parasites   | Literature |
| Radiolaria       | division        | phagotrophs | Literature |
| Protalveolata    | supergroup      | phagotrophs | Literature |

**Table S2:** Eukaryotic 18S rRNA primers used for metaPR2 datasets with the number of datasets (N) where used (Table 1).

| Name            | Sequence               | Region | Direction | Reference                    | DOI                              | N  |
|-----------------|------------------------|--------|-----------|------------------------------|----------------------------------|----|
| TAReuk454FWD1   | CCAGCASCYCGCGTAATTCC   | V4     | fwd       | Stoeck et al (2010)          | 10.1111/j.1365-294X.2009.04480.x | 21 |
| E572F           | CYCGCGTAATTCCAGCTC     | V4     | fwd       | Comeau et al. (2011)         | 10.1371/journal.pone.0027492     | 7  |
| 3NDF            | GGCAAGTCTGGTGCCAG      | V4     | fwd       | Cavalier-Smith et al. (2009) | 10.1016/j.protis.2009.03.003     | 2  |
| 528F            | GCGGTAATTCAGTCCAA      | V4     | fwd       | Cheung et al. (2010)         | 10.1038/ismej.2010.26            | 2  |
| NSF573          | CGCGGTAATTCAGTCCA      | V4     | fwd       | Mangot et al. (2013)         | 10.1111/1462-2920.12065          | 2  |
| 1380F           | CCCTGCCHTTTGACACAC     | V9     | fwd       | Amaral Zettler et al (2009)  | 10.1371/journal.pone.0006372     | 1  |
| 1389F           | TTGTACACACCGCCC        | V9     | fwd       | Amaral Zettler et al (2009)  | 10.1371/journal.pone.0006372     | 1  |
| 515F            | GTGCCAGCMGCCGCGGTAA    | V4     | fwd       | Parfrey et al. (2014)        | 10.3389/fmicb.2014.00298         | 1  |
| 528F            | CCGCGGTAATTCAGCTC      | V4     | fwd       | Zhu et al. (2005)            | 10.1016/j.femsec.2004.10.006     | 1  |
| EK-565F         | GCAGTAAAAAGCTCGTAGT    | V4     | fwd       | Simon et al. (2015)          | 10.1111/1462-2920.12591          | 1  |
| EuF-V4          | CCAGCASCYCGGTAATWCC    | V4     | fwd       | Boscaro et al. (2017)        | 10.1007/s00248-016-0912-8        | 1  |
| EuF-V4          | CCAGCASCYCGGTAATWCC    | V4     | fwd       | Belevich et al. (2017)       | 10.1007/s00248-017-1076-x        | 1  |
| TAReukFWD1      | CCAGCASCYCGGTAAT       | V4     | fwd       | Annenkova et al. (2020)      | 10.3390/microorganisms8040543    | 1  |
| TAReukREV3      | ACTTTCGTTCTTGATYRA     | V4     | rev       | Stoeck et al (2010)          | 10.1111/j.1365-294X.2009.04480.x | 15 |
| V4 18S Next.Rev | ACTTTCGTTCTTGATYRATGA  | V4     | rev       | Piredda et al. (2017)        | 10.1093/femsec/fiw200            | 7  |
| E1009R          | AYGGTATCTRATCRTCTTYG   | V4     | rev       | Comeau et al. (2011)         | 10.1371/journal.pone.0027492     | 6  |
| 1055R           | ACGGCCATGCACCACCCAT    | V4     | rev       | Alves-de-Souza et al (2011)  | 10.5194/bg-8-2125-2011           | 2  |
| 1510R           | CCTTCYGCAGTTCCACCTAC   | V9     | rev       | Lopez-Garcia et al. (2003)   | 10.1073/pnas.0235779100          | 2  |
| NSR951          | TTGGYRAATGCTTTCGC      | V4     | rev       | Mangot et al. (2013)         | 10.1111/1462-2920.12065          | 2  |
| V4_euk_R2       | ACGGTATCTRATCRTCTTCG   | V4     | rev       | Brate et al. (2010)          | 10.1038/ismej.2010.39            | 2  |
| 1119r           | GGTGCCCTCCGTC          | V4     | rev       | Parfrey et al. (2014)        | 10.3389/fmicb.2014.00298         | 1  |
| 897R            | TCYDAGAATTYCACCTCT     | V4     | rev       | Hugerth et al. (2014)        | 10.1371/journal.pone.0095567     | 1  |
| EUK1134-R       | TTTAAGTTTCAGCCTTGCC    | V4     | rev       | Carnegie et al. (2003)       | 10.3354/dao054219                | 1  |
| Nex_18S_0964_R  | GATCCCYAACTTTCGTTCTTGA | V4     | rev       | Kim et al. (2016)            | 10.1111/1462-2920.13523          | 1  |
| picoR2          | AKCCCCYAACTTTCGTTCTTGA | V4     | rev       | Belevich et al. (2017)       | 10.1007/s00248-017-1076-x        | 1  |

**Table S3:** 18S rRNA primer sets used for metaPR2 datasets with the number of datasets (N) where used (Table 1). Refer to Table S2 for sequence and reference of primers.

| Primer fwd     | Primer rev      | Region | N  |
|----------------|-----------------|--------|----|
| TAReuk454FWD1  | TAReukREV3      | V4     | 14 |
| TAReuk454FWD1  | V4 18S Next.Rev | V4     | 7  |
| E572F          | E1009R          | V4     | 6  |
| 3NDF           | V4_euk_R2       | V4     | 2  |
| 528F           | 1055R           | V4     | 2  |
| NSF573         | NSR951          | V4     | 2  |
| 1380F          | 1510R           | V9     | 1  |
| 1389F          | 1510R           | V9     | 1  |
| E572F          | 897R            | V4     | 1  |
| EK-565F        | UNonMet         | V4     | 1  |
| EuF-V4         | picoR2          | V4     | 1  |
| F515           | R119            | V4     | 1  |
| Nex_18S_0587_F | Nex_18S_0964_R  | V4     | 1  |
| TAReukFWD1     | TAReukREV3      | V4     | 1  |



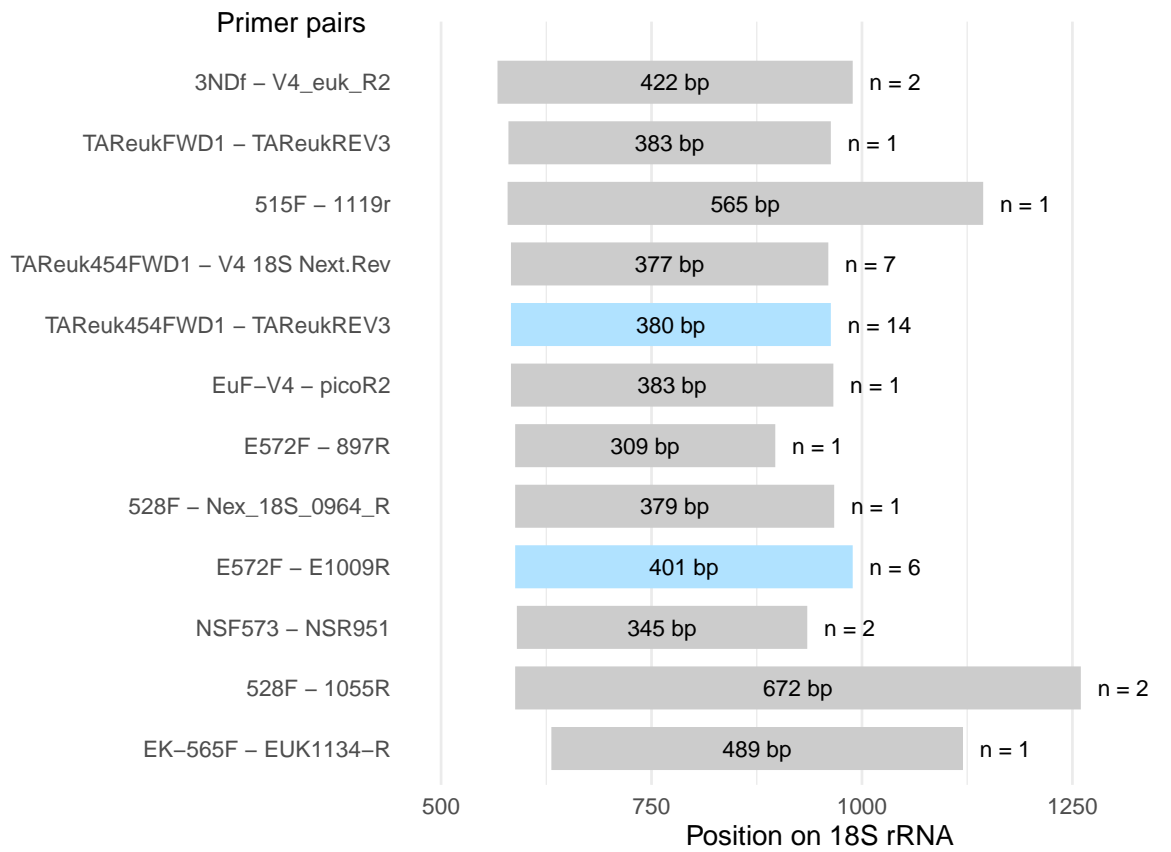

**Figure S1:** Amplicon size and position on the 18S rRNA gene (yeast), with the number of datasets for each V4 primer pair on the right side.

### Number of samples

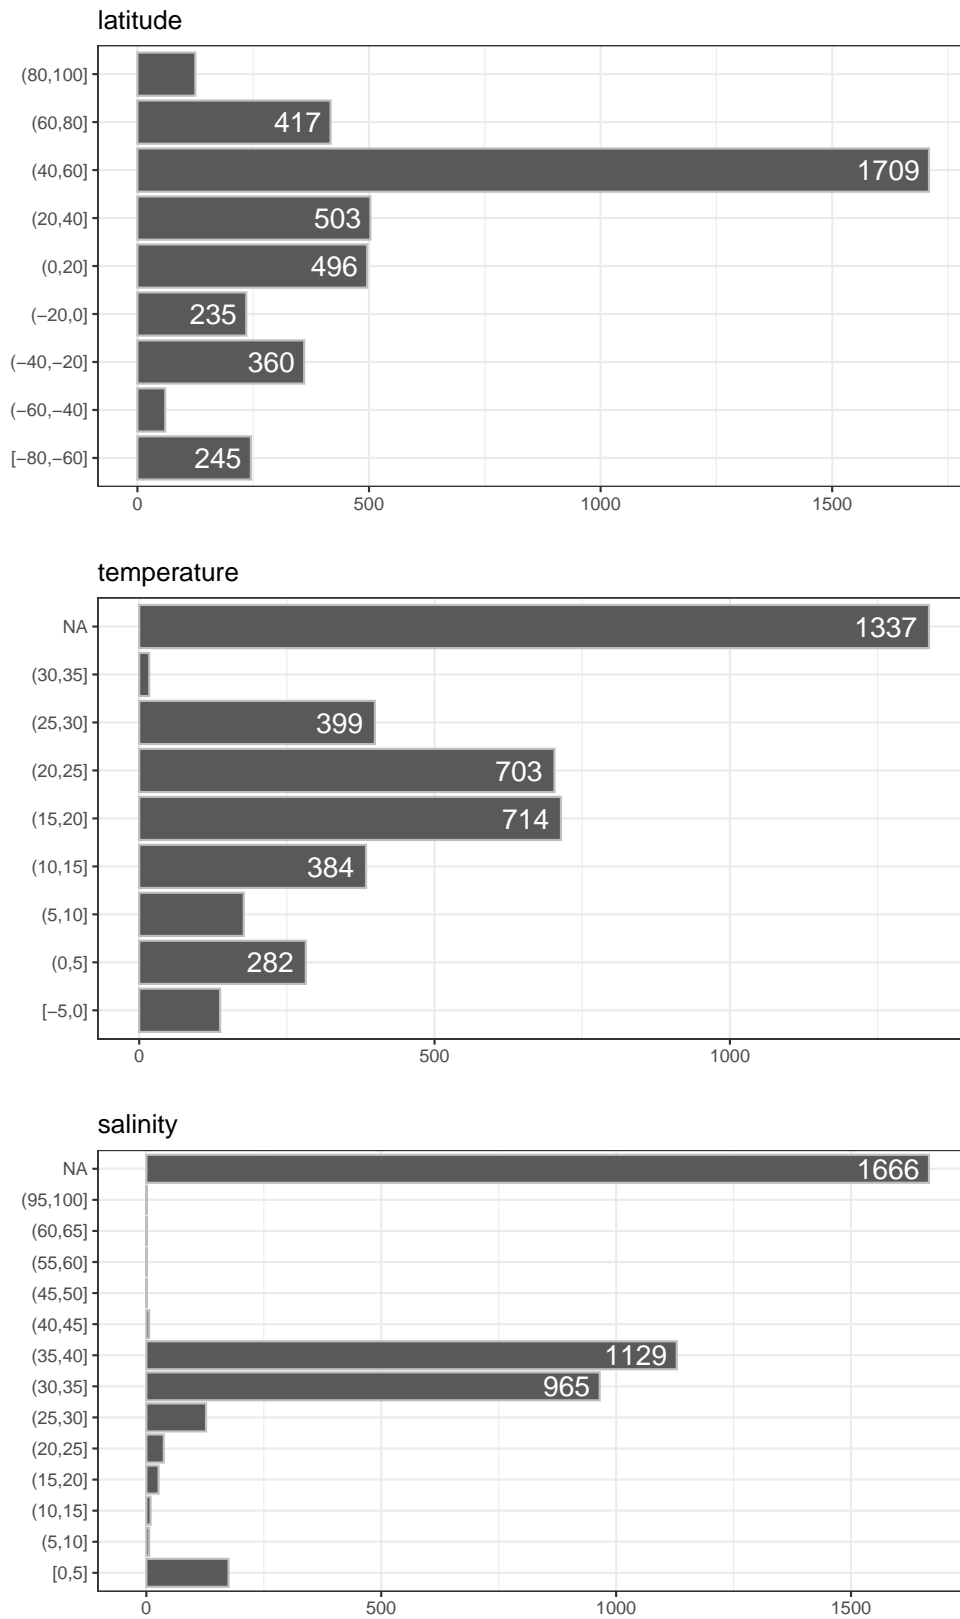

**Figure S2:** Distribution of samples by latitude, temperature and salinity ranges. NA corresponds to samples for which the data are not available.

A - MAST8

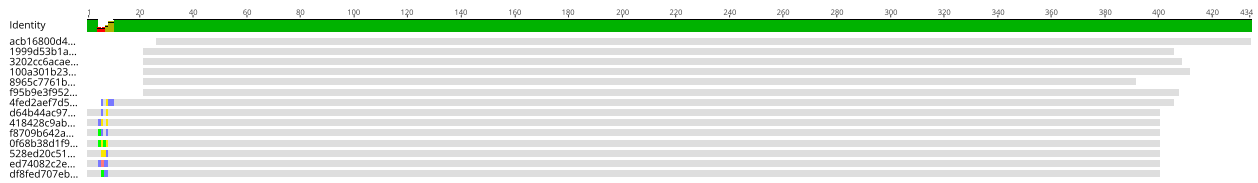

B - Ciliate

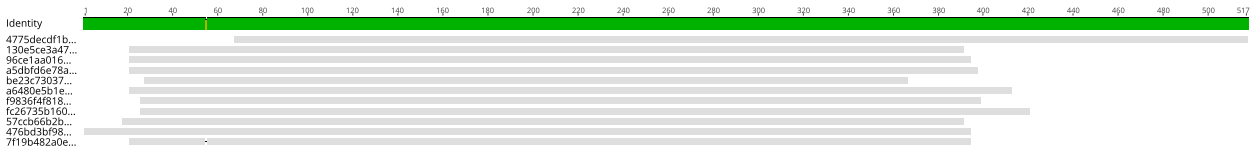

**Figure S3:** Two examples of V4 sequence clusters ASV (cASV) for Stramenopiles MAST 8 (A) and ciliates (B).

Reads

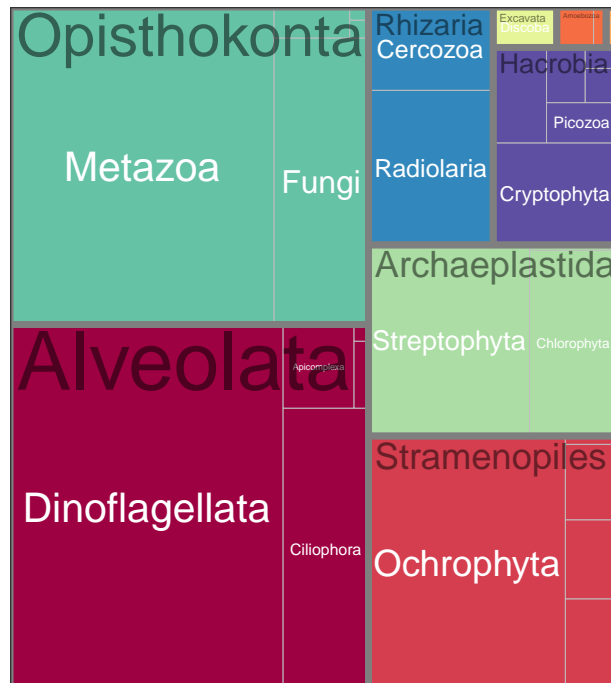

cASVs

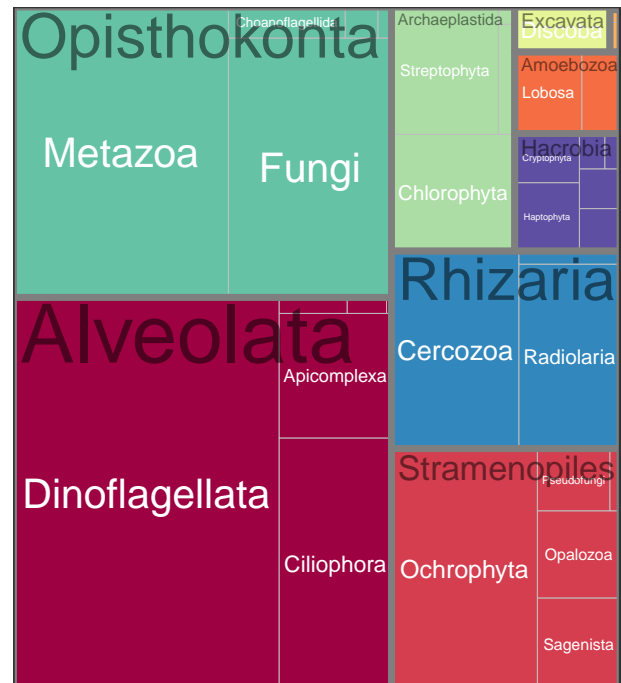

**Figure S4:** Treemaps of most abundant taxa (supergroup and division) for all datasets (V4 and V9) based on number of reads after normalization (left) or number of cASVs (right).

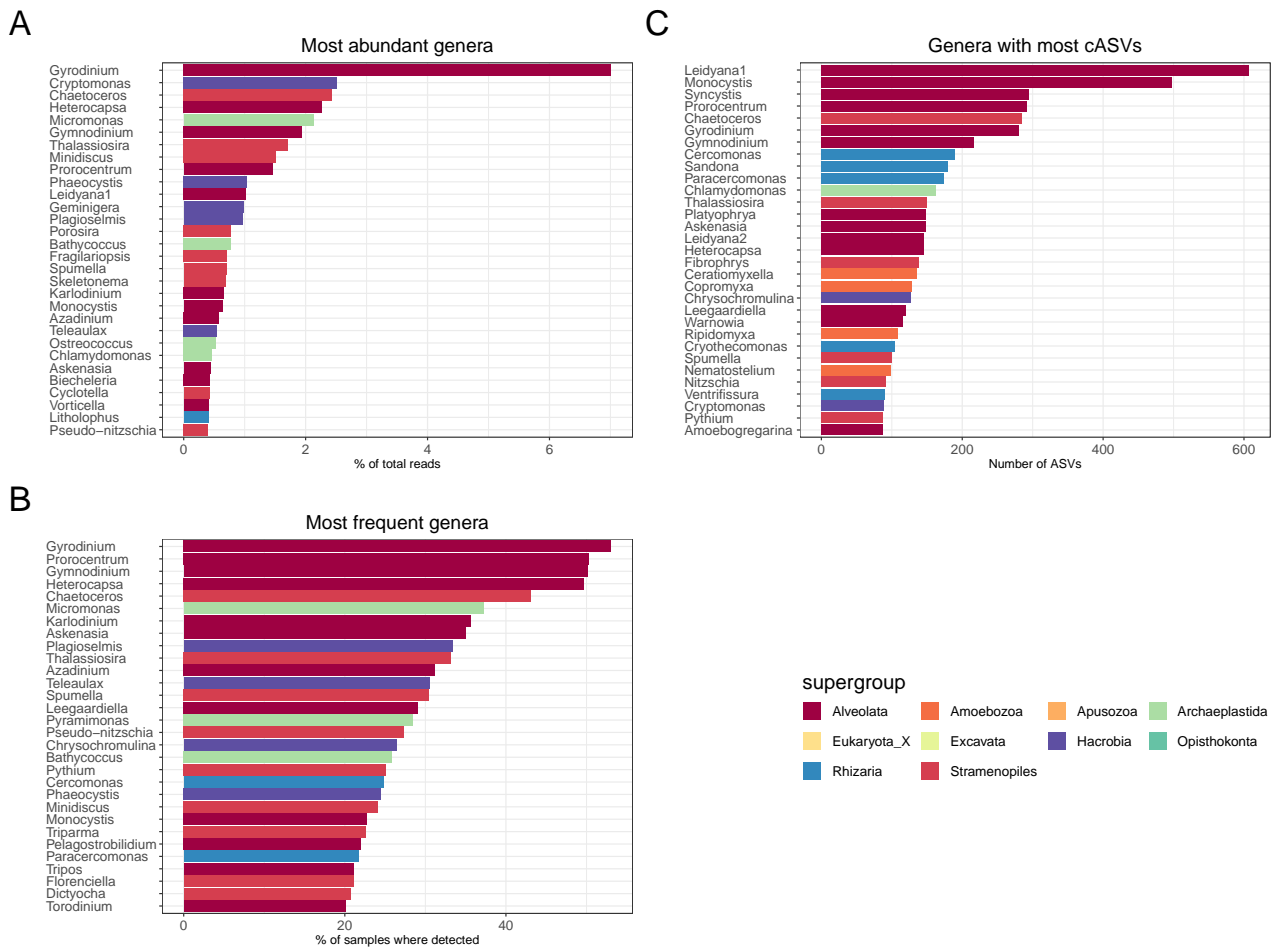

**Figure S5:** Protist genus analysis for for the V4 dataset after normalization. A. Most abundant genera. B. Most frequent genera. C. Genera with most cASVs.

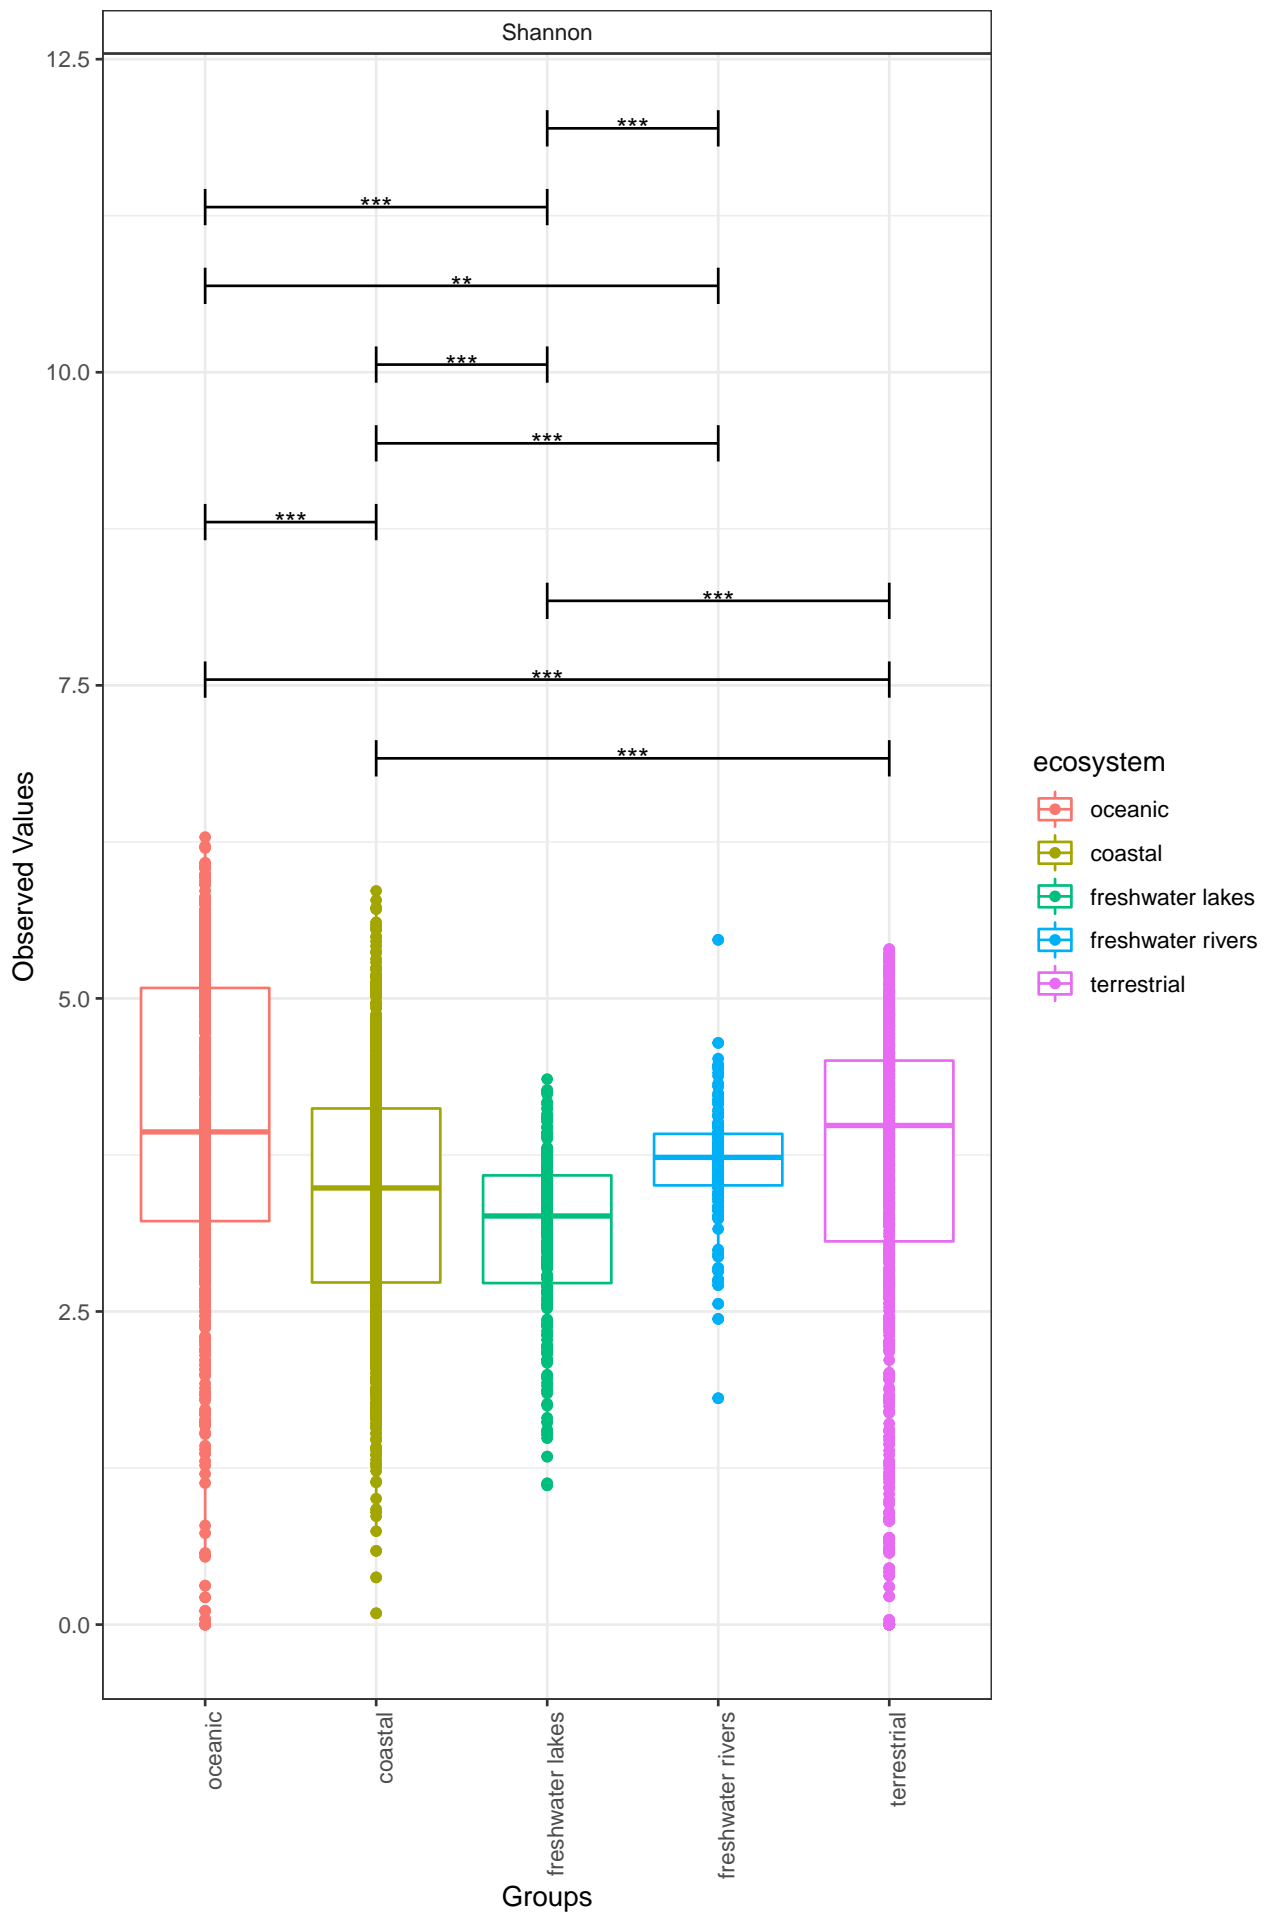

**Figure S6:** Protist V4 ASVs. Shannon's diversity index as a function of the environment with significance (\*\* p-value < 0.01, \*\*\* p-value < 0.001).

About Datasets Treemap Map Barplot Diversity Query Download

# metaPR2

Database version 1.0.0 : 41 datasets

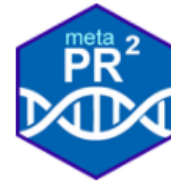

## A database of 18S rRNA metabarcodes

### Presentation

MetaPR2 is a database of published 18S rRNA metabarcodes that have been reprocessed and assigned using PR2.

### Accessing the database

Access to the database to map, search and download the barcodes can be done in three different ways:

- Using a [web interface](#).
- Download the R package and launch the shiny application.
- Download and run a Docker container

#### Web interface

- <https://metapr2-dcx2qwgoua-as.a.run.app/>

#### metaPR2 shiny R package

(NOT YET AVAILABLE)

Install the package from GitHub and launch function `metapr2App()`

```
install.packages(devtools)

devtools::install_github("pr2database/metapr2-shiny")

metapr2::metapr2App()
```

#### The metaPR2 Docker container

(NOT YET AVAILABLE)

Will be available from Docker repository

### Help

Extensive help is provided [here](#).

### Errors

Please report errors in the [Issues page of the metaPR2 database](#).

### Citation

Vaulot, D. et al. (2021). metaPR2 : An interactive 18S rRNA metabarcode database. Unpublished

### Maintainer

- Daniel Vaulot: [vaulot@gmail.com](mailto:vaulot@gmail.com)

### Contributors

- Daniel Vaulot, CNRS Roscoff, NTU-ASE Geek lab
- Adriana Lopes dos Santos, NTU-ASE Geek lab
- Clarence Sim, NTU-ASE Geek lab
- Denise Ong, NTU-ASE Geek lab
- Bryan Teo, NTU-ASE Geek lab
- Mahwash Jamy, Uppsala University Sweden
- Charlie Biver, Uppsala University Sweden

**Figure S7:** Shiny panel "about".



The metaPR2 database

Select datasets

41 items selected

Select All
Deselect All

- Antarctic\_Fieldees\_Bay\_2013 ✓
- Antarctic\_Fieldees\_Bay\_2015\_18S\_V4 ✓
- Antarctic\_Fieldees\_Bay\_2015\_18S\_V4\_sorted ✓
- Arctic\_Baffin\_Bay\_2013 ✓
- Arctic\_Beaufort\_Sea\_MALINA\_2014 ✓
- Arctic\_Nansen\_Basin\_2012 ✓
- Arctic\_Nares\_Strait\_2014 ✓
- Arctic\_Ocean\_Central\_2012 ✓
- Arctic\_Ocean\_PS80\_2012 ✓
- Arctic\_Ocean\_Survey\_2005\_2011 ✓
- Arctic\_White\_Sea\_2013\_2015 ✓
- Baltic\_Sea\_2012\_2013 ✓
- Baltic\_Sea\_Gdansk\_2012 ✓
- Chukchi\_Sea\_ICESCAPE\_2010 ✓
- European\_coast\_Biomarks\_2009 ✓
- Italy\_Naples\_2011 ✓
- Lake\_Baikal\_2013 ✓
- Lake\_Chaohu\_2014\_2015 ✓
- Lake\_Chevreuse\_2012 ✓
- Lake\_Fuxian\_2015 ✓
- Lake\_Garda ✓
- Lakes\_Argentina ✓
- Lakes\_mountain\_2013 ✓
- Lakes\_Scandinavia ✓
- Malaspina\_surface\_2010\_2011 ✓
- Malaspina\_vertical\_2010\_2011 ✓
- Mariana\_Trench\_2016\_1 ✓
- Mariana\_Trench\_2016\_2 ✓
- Norway\_Oslo\_fjord\_2009\_2011 ✓
- OSD\_2014\_V4\_LGC ✓
- OSD\_2014\_V4\_LW ✓
- OSD\_2015\_V4 ✓
- River\_Parana ✓
- River\_Saint\_Charles\_2016\_2017 ✓
- Soils\_Global\_2012 ✓
- Soils\_Neotropical ✓
- Soils\_Swiss ✓
- Spain\_Blanes\_2004\_2013 ✓
- Tara\_Arctic\_V4 ✓
- Tara\_Ocean\_V4 ✓
- Tara\_Oceans\_V9 ✓

About
Datasets
Treemap
Map
Barplot
Diversity
Query
Download
Help

Quick dataset selection.

**Dataset groups**

marine\_global\_V4  oceanic  coastal  rivers  lakes  soils  arctic  antarctic  temperate  tropical  time series

Show **10** entries Search:

| dataset_id | dataset_name                                     | region         | paper_reference                                                                                                                                                                                                                                                                                                                                                                                                           | sample_number | asv_number | n_reads_mean | selected |
|------------|--------------------------------------------------|----------------|---------------------------------------------------------------------------------------------------------------------------------------------------------------------------------------------------------------------------------------------------------------------------------------------------------------------------------------------------------------------------------------------------------------------------|---------------|------------|--------------|----------|
| 11         | Antarctic Fieldees Bay- 2013                     | Southern Ocean | Luo, W. et al. Molecular diversity of microbial eukaryotes in sea water from Fildes Peninsula, King George Island, Antarctica. <i>Polar Biol.</i> (2015)                                                                                                                                                                                                                                                                  | 10            | 69         | 13631        | true     |
| 16         | Antarctic Fieldees Bay 2015 18S V4               | Southern Ocean | Trefault, N., De la Iglesia, R., Moreno-Pino, M., Lopes dos Santos, A., G-e9-rikas Ribeiro, C., Parada-Pozo, G., Cristi, A., Marie, D., & Vaulot, D. (2021). Annual phytoplankton dynamics in coastal waters from Fildes Bay, Western Antarctic Peninsula. <i>Scientific Reports</i> , 11(1), 1368.                                                                                                                       | 123           | 685        | 48261        | true     |
| 18         | Antarctic Fieldees Bay 2015 18S V4 sorted        | Southern Ocean | Trefault, N., De la Iglesia, R., Moreno-Pino, M., Lopes dos Santos, A., G-e9-rikas Ribeiro, C., Parada-Pozo, G., Cristi, A., Marie, D., & Vaulot, D. (2021). Annual phytoplankton dynamics in coastal waters from Fildes Bay, Western Antarctic Peninsula. <i>Scientific Reports</i> , 11(1), 1368.                                                                                                                       | 60            | 280        | 31615        | true     |
| 9          | Arctic Nansen Basin - 2012                       | Arctic Ocean   | Metties, K., von Appen, W.-J., Killas, E., Nicolaus, A. & N-16>thg, E.-M. Biogeography and Photosynthetic Biomass of Arctic Marine Pico-Eukaryotes during Summer of the Record Sea Ice Minimum 2012. <i>PLoS One</i> 11, 20 pp. (2016)                                                                                                                                                                                    | 17            | 328        | 13700        | true     |
| 42         | Arctic Nares Strait - 2014                       | Arctic Ocean   | Kalenitchenko D., Joli N., Potvin M., Tremblay J.-c&e9-, Lovejoy C. 2019. Biodiversity and Species Change in the Arctic Ocean: A View Through the Lens of Nares Strait. <i>Frontiers in Marine Science</i> 6:1-96>17.                                                                                                                                                                                                     | 247           | 1510       | 38626        | true     |
| 6          | Arctic Ocean Central - 2012                      | Arctic Ocean   | Stecher, A., Neuhaus, S., Lange, B., Frickenhaus, S., Beszteri, B., Kroth, P.G. & Valentin, K. 2015. rRNA and rDNA based assessment of sea ice protist biodiversity from the central Arctic Ocean. <i>Eur. J. Phycol.</i> 1-96>16.                                                                                                                                                                                        | 8             | 182        | 36628        | true     |
| 40         | Arctic Ocean Survey - 2005- 2011                 | Arctic Ocean   | Thaler M., Lovejoy C., Sea B. 2015. Biogeography of Heterotrophic Flagellate Populations Indicates the Presence of Generalist and Specialist Taxa in the Arctic Ocean. <i>Applied and Environmental Microbiology</i> 81.2137-96>2148                                                                                                                                                                                      | 36            | 467        | 7136         | true     |
| 5          | Arctic Ocean, Beaufort Sea, MALINA cruise - 2009 | Arctic Ocean   | Monier, A., Terrado, R., Thaler, M., Comeau, A., Medrinal, E. & Lovejoy, C. 2013. Upper Arctic Ocean water masses harbor distinct communities of heterotrophic flagellates. <i>Biogeosciences</i> . 10:4273-96>88. Monier, A., Comte, J., Babin, M., Forest, A., Matsuoka, A. & Lovejoy, C. 2014. Oceanographic structure drives the assembly processes of microbial eukaryotic communities. <i>ISME J.</i> 9:990-96>1002 | 24            | 270        | 6704         | true     |
| 39         | Arctic Polarstern expedition ARK-XXVII/3 - 2012  | Arctic Ocean   | Rapp J.Z., Fern-s1>ndez, M-e9>ndez M., Bianthold C., Boetius A. 2018. Effects of Ice-Algal Aggregate Export on the Connectivity of Bacterial Communities in the Central Arctic Ocean. <i>Frontiers in Microbiology</i> 9:1035                                                                                                                                                                                             | 45            | 978        | 73833        | true     |
| 38         | Arctic White Sea - 2013-2015                     | Arctic Ocean   | Belevich TA., Ilyash L.V., Milyutina IA., Logacheva MD., Goryunov D.V., Troitsky A.V. 2017. Photosynthetic Picoeukaryotes in the Land-Fast Ice of the White Sea, Russia. <i>Microbial Ecology</i> . 1-96>16.                                                                                                                                                                                                              | 17            | 380        | 23990        | true     |

Showing 1 to 10 of 41 entries Previous **1** 2 3 4 5 Next

Figure S8: Shiny panel "datasets".

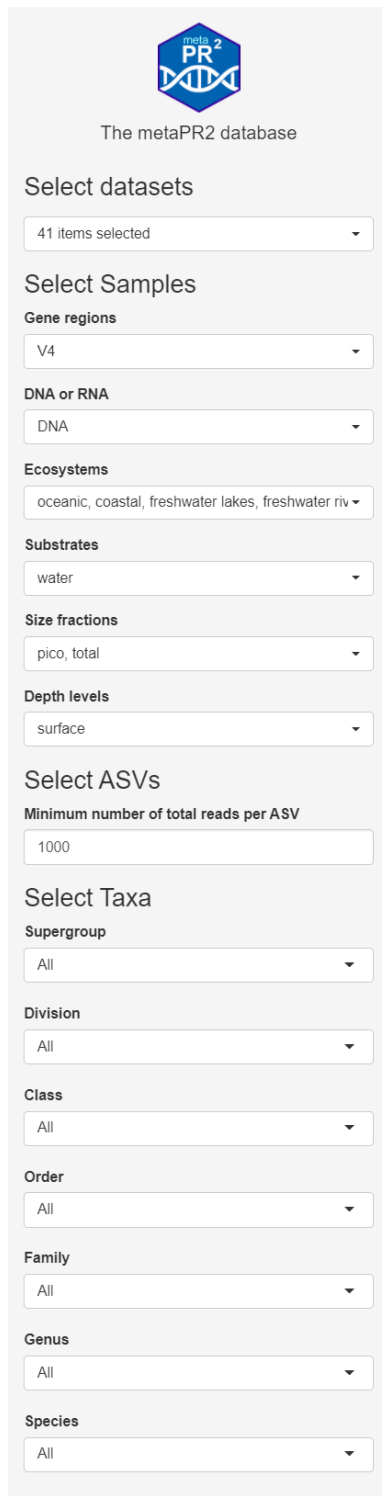

The metaPR2 database

**Select datasets**  
41 items selected

**Select Samples**

**Gene regions**  
V4

**DNA or RNA**  
DNA

**Ecosystems**  
oceanic, coastal, freshwater lakes, freshwater riv

**Substrates**  
water

**Size fractions**  
pico, total

**Depth levels**  
surface

**Select ASVs**  
Minimum number of total reads per ASV  
1000

**Select Taxa**

**Supergroup**  
All

**Division**  
All

**Class**  
All

**Order**  
All

**Family**  
All

**Genus**  
All

**Species**  
All

**Figure S9:** Shiny sample selection sidebar.



About Datasets **Treemap** Map Barplot Alpha diversity Beta diversity Query Download

Number of reads have been normalized (not rarefield) to 100 with 3 decimals.

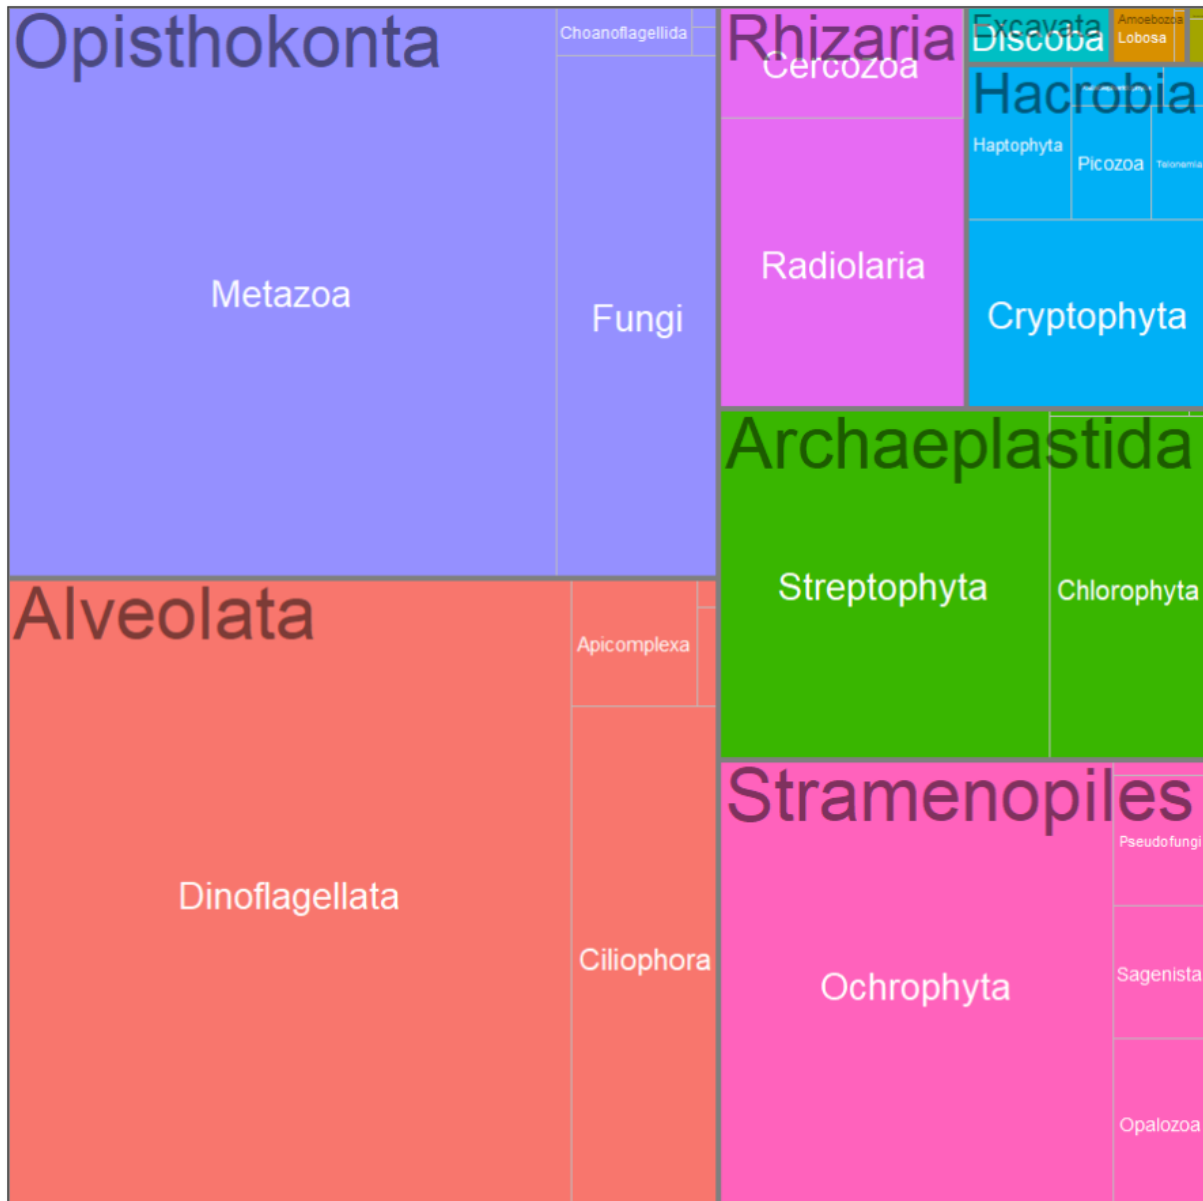

Figure S10: Shiny panel "treemap".

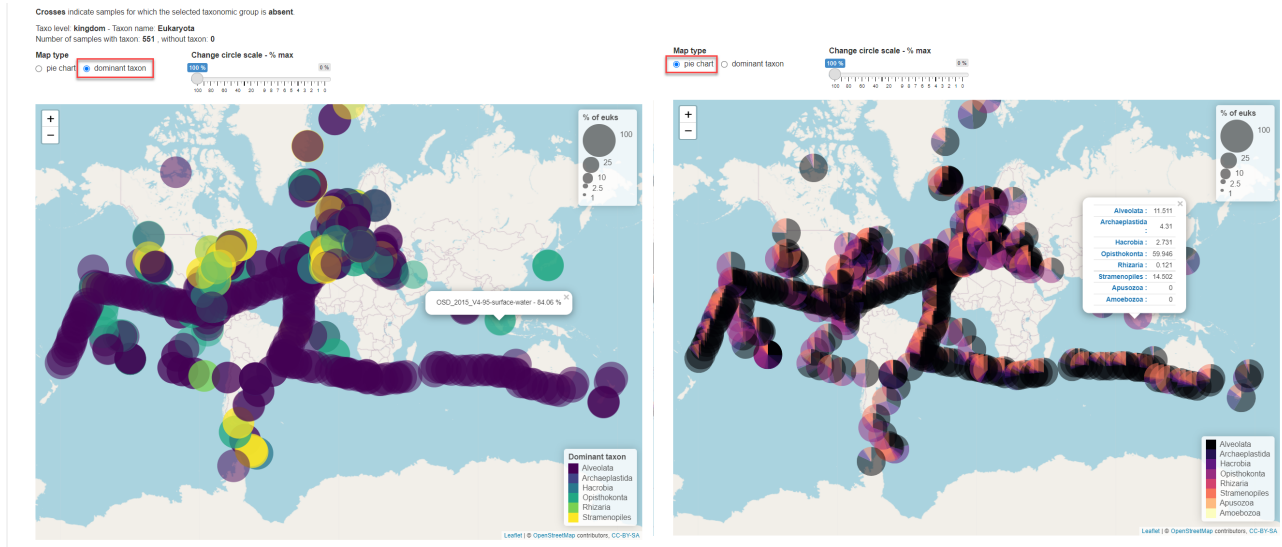

Figure S11: Shiny panel "map".

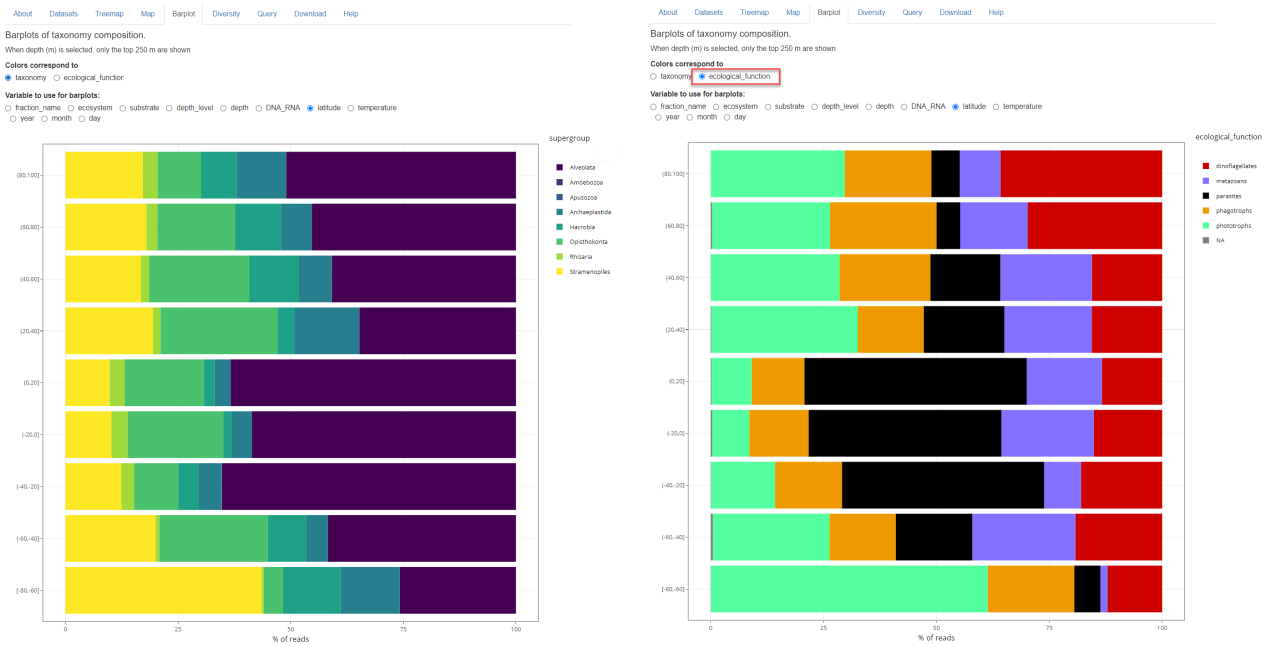

Figure S12: Shiny panel "barplot".

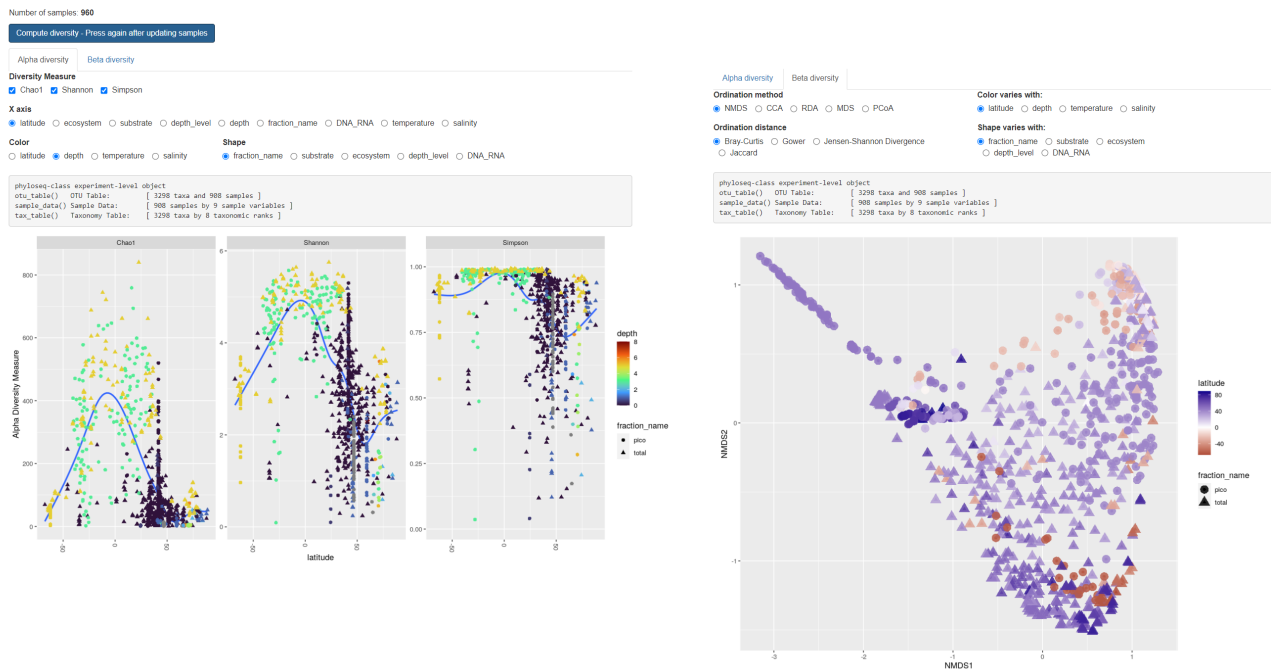

Figure S13: Shiny panel "diversity".

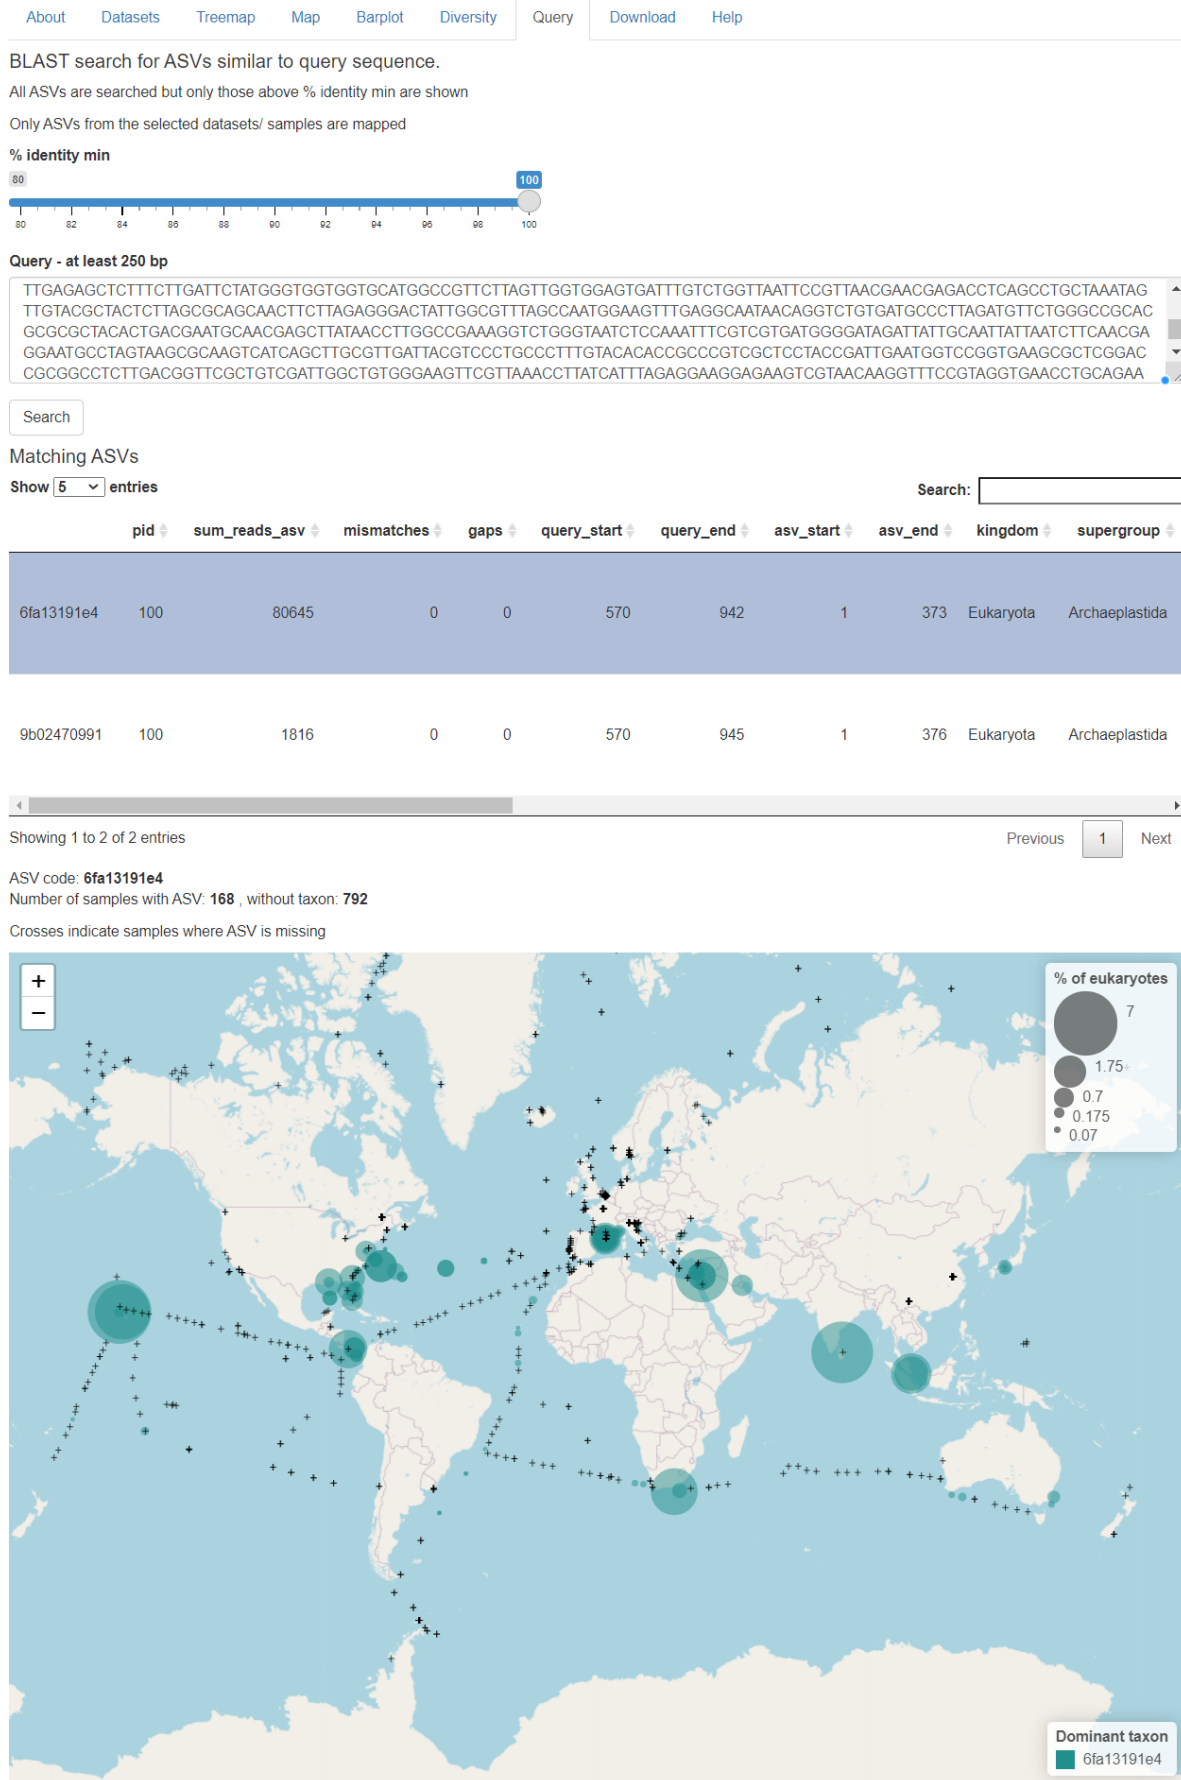

Figure S14: Shiny panel "query".

About Datasets Treemap Map Barplot Diversity Query **Download** Help

Selected damples, datasets and taxa

The following files are provided. They can be linked by key fields. They only contain the selected datasets, sample type and taxa. **The asv\_reads and phyloseq files can be very big** if you download all datasets and all taxa. Phyloseq files will only be created for less than 1000 samples selected.

| file             | content                                                                                                                                                       | key fields              |
|------------------|---------------------------------------------------------------------------------------------------------------------------------------------------------------|-------------------------|
| datasets.xlsx    | Information on the different datasets selected including reference and GenBank id                                                                             | dataset_id              |
| samples.xlsx     | List of samples selected with medadata                                                                                                                        | file_code               |
| asv.xlsx         | ASV selected with taxonomy and sequence                                                                                                                       | asv_code                |
| asv_reads.tsv.gz | Percent of reads (normalized to total number of eukaryotic reads in the sample), for each ASV and each sample (long form).                                    | asv_code, file_code     |
| phyloseq.rds     | File to use with phyloseq R package ( <a href="https://joey711.github.io/phyloseq/">https://joey711.github.io/phyloseq/</a> ). Use readRDS() function to read | <b>5000 samples max</b> |

Number of samples: **960**

[Download datasets, samples and ASVs \(zip\)](#) [Download ASVs abundance \(tsv.gz\)](#)

```
Make phyloseq done
phyloseq-class experiment-level object
otu_table() OTU Table: [ 3298 taxa and 908 samples ]
sample_data() Sample Data: [ 908 samples by 9 sample variables ]
tax_table() Taxonomy Table: [ 3298 taxa by 8 taxonomic ranks ]
phyloseq-class experiment-level object
otu_table() OTU Table: [ 3298 taxa and 908 samples ]
sample_data() Sample Data: [ 908 samples by 9 sample variables ]
tax_table() Taxonomy Table: [ 3298 taxa by 8 taxonomic ranks ]
```

[Download phyloseq file \(rds\)](#)

Figure S15: Shiny panel "download".
